# Supplementary material for: Using Digital RNA Counting and Flow Cytometry to Compare mRNA with Protein Expression in Acute Leukemias
Source: PLoS One. 2012 Nov 9;7(11):e49010. doi: 10.1371/journal.pone.0049010 (PMC3494663; doi:10.1371/journal.pone.0049010)
Supplement: Table S4 — A BM sample from a patient with B-ALL containing 98% blasts was analyzed with the nCounter. Samples were run undiluted, and diluted 1/2, 1/4, 1/8, 1/16 and 1/32 in normal BM. Genes, which were expressed by the leukemic blasts, are highlighted in gray, as well as the dilutions at which a distinction between leukemic and normal sample was possible ( = sensitivity of the assay for the detection of this gene). (XLSX) [file pone.0049010.s007.xlsx]

## Sheet: Sheet1
Table S 4: dilution of a leukemia sample in a normal BM sample
	Leukemia	dil 1/2	dil 1/4	dil 1/8	dil 1/16	dil 1/32	normal BM
	LLA-B
	% blasts
	98	49	25	12	6	3	1
						0
ALAS2	243.831	2561	4555	4800	4989	5140	5143.21
Carbonic anhydrase 1, CA1	2849.78	27685	41599	48671	52079	53701	55524.2
CD10, MME	28162.5	14125	7541	3215	2160.16	2078	2406.36
CD110, MPL	9	23	56	69	99	101	68.2159
CD114, CSF3R	327.648	10564	15001	16419	17598	18392	18726.9
CD116, CSF2RA	1	1420	2076	2567	2374	2599	2929.16
CD117, KIT	739.113	369.556	284.778	241.737	294.737	271.737	281.737
CD11b, ITGAM, MAC-1	9004	11234	15738	16778	17355	17234	18458.9
CD11c, ITGAX	45.7183	3141	4978	5565	5923	6003	6220.36
CD123, IL3RA	2232.58	1106	606	493	578	510	570.342
CD13, ANPEP	251.451	3001	4710	6219	6981	7321	7074.88
CD133, PROM1	1	59	78	145	249	179	185.074
CD135, FLT3	2072.56	1112	488	299	305	259	273.334
CD14	114.296	2166	2967	3321	3211	3674	3952.79
CD143, ACE	1	1	1	1	1	1	1
CD15, FUT4	457.183	792	1287	1444	1592	1582	1768.77
CD150, SLAMF1	198.113	99.0564	49.5282	63	61	74	69.6995
CD163	1	433	568	621	684	702	766.577
CD16a, FCGR3A	45.7183	4699	6955	8333	8921	9345	9789.97
CD19	10332.3	5101.17	2683.09	1268.54	665.771	322.886	191.255
CD1a	1	9	0.25	3	1	4	4.38204
CD2	1	50	56	66	59	91	98.3276
CD20, MS4A1	1	244	256	321	376	381	392.708
CD200	7261.59	3499.8	1875.4	807.699	433.85	226.925	86.1217
CD203c. ENPP3	1	0.5	0.25	0.125	1	2	2.39259
CD21, CR2	1	77	78	69	82	89	95.9702
CD22	22005.8	11772.9	5665.44	2750.72	1304.36	687.68	409.026
CD23,FCER2	1	15	23	17	40	39	41.5738
CD231, TSPAN7	15.2394	100	191	202	204	271	244.628
CD235a, glycophorine, GYPA	1	405	712	756	801	809	935.203
CD243, ABCB1, MDR1	1	55	87	103	173	154	153.154
CD244, NKR2B4	1	256	278	344	367	382	414.374
CD25, IL2RA	1	0.5	4	22	12	14	13.5198
CD26, DPP4	1	5	6	10	11	20	20.8945
CD27, TNFRSF7	1	5	7	6	8	6	8.38124
CD28	1	100	157	202	267	268	296.41
CD30, TNFRSF8	1	17	24	54	59	56	59.0771
CD300E, IREM2	1	305	647	728	999	1103	1067.24
CD303, CLEC4C	1	121	186	267	265	288	279.608
CD304, NRP1	1	50	54	82	102	103	113.538
CD33	1	399	764	895	901	999	1069.19
CD34	15247.1	8623.53	3921.77	2005.88	1112.94	376.471	31.7068
CD36	60.9578	4002	5899	6472	7459	7866	8233.32
CD38	25198.4	11599.2	6232.6	3079.8	1676.9	787.451	1260.83
CD3	1	389	578	676	704	799	819.177
CD4	1	386	558	679	782	817	743.003
CD41, ITGA2B	1	1134	1645	1903	2011	2054	2123.18
CD42b, GP1BA	1	234	278	321	392	452	485.256
CD44	3436.49	3325	4666	5498	6346	6957	7183.64
CD45, PTPRC, LCA	29915	29957	26534	30113	32444	39725	35825.8
CD5	1	214	392	440	414	567	510.828
CD56, NCAM1	1	3	4	6	1	9	8.13877
CD57	182.873	97.4367	51.7183	30.8592	11.4296	5.71479	7.89881
CD58	25648	12801	6412	6821	6199	6555	6652.5
CD61, ITGB3	1	921	1287	1404	1479	1575	1702.69
CD64, FCGR1A	1	202	297	349	391	402	455.896
CD66b; CD67, CEACAM8	777.212	25002	32456	39966	44002	43998	48430.3
CD68	320.028	1553	2563	3022	3334	3602	3831.89
CD7	1	207	276	302	355	402	444.529
CD71, TFRC	11437.2	11305	11365	11954	11233	11958	11952
CD79a	53673.3	26536.7	14415.3	6759.16	3478.58	1677.29	1243.53
CD79b	1699.2	1212.6	574.799	282.4	206.2	53.0999	45.4392
CD85g; LILRA4	1	0.5	0.25	1	0.0625	1	1
CD8A	800.071	903	1054	1132	1351	1167	1204.25
CD8B	1	32	67	73	72	89	112.958
CD9	15041.3	7650.66	3230.33	1880.17	1299	1376	1348.71
CD90, THY1	1	0	0	2	0	0	1
CD96, TACTILE	4206.09	2007.04	1051.52	789	801	845	808.425
CD99, MIC2	36468	18294	9168	6558.5	6279.25	6600	6682.88
CLL-1 (CLEC12A)	24070.7	13535.3	6917.67	7091	6823	6981	6875.9
Elastase, ELANE, ELA2	1	4441	5219	6667	7210	7633	7808.18
HLA-DR A	112025	55412.6	29006.3	18003.1	18125	18222	18710.1
HLA-DR B	39554	19707	9888.49	5538	5573	5421	5480.32
IgD	6431.04	3152.52	1706.76	1279.88	1450	1399	1546.21
IgM	94934.1	51467.1	24133.5	12866.8	12999.4	12966.7	12534.2
kappa	2544.99	43555	61233	73454	81238	84377	87974.3
Ki67, MKI67	7040.62	7644	7977	8378	8972	8988	9116.76
Lactotransferrin, LTF	9593.23	180003	260541	317784	319965	344591	351749
lambda	7627.34	15498	23994	27869	30003	32115	32574.1
Lysozyme, LYZ	18744.5	253421	367550	324509	444587	555076	597061
MPO	792.451	40978	52376	63445	69887	71220	77378.1
PRG2, major basic protein eosinophil	2110.66	80932	123435	156734	153421	156889	151167
TCL1A	115949	67505.6	36957.3	18434.7	7861.83	3623.42	1167.79
TCRA	1501.09	1299	1375.27	1187.64	1193.82	1246.91	1287.37
TCRB	10789.5	5492.76	2897.38	2790	2674.35	2337.17	2820.55
TdT, DNTT	15498.5	7749.26	3874.63	1937.31	968.657	484.329	681.657
Tryptase , TPSAB1	1	340	611	613	681	739	757.76
