# Supplementary material for: Using Digital RNA Counting and Flow Cytometry to Compare mRNA with Protein Expression in Acute Leukemias
Source: PLoS One. 2012 Nov 9;7(11):e49010. doi: 10.1371/journal.pone.0049010 (PMC3494663; doi:10.1371/journal.pone.0049010)
Supplement: Table S6 — Concordance between Flow Cytometry and nCounter values for forty-one different leukemia samples obtained from other Swiss Centers. The forty-one samples were ordered according to the % of concordance between results from nCounter technology and flow cytometry. Two of the original forty-three samples were not analysed (degraded material). (XLSX) [file pone.0049010.s009.xlsx]

## Sheet: Sheet1
Suppl Table 6: concordance between Flow Cytometry and nCounter
for 43 leukemia samples (other swiss centers)
						Discrepancies
Swiss Center	Diagnosis	Total antigens	Concordant	Concordance		nCounter pos	nCounter neg
		studied	results	%		Flow neg	Flow pos
LAUSANNE	AML M1/M2	23	23	100		0	0
LAUSANNE	B-ALL	19	19	100		0	0
LAUSANNE	B-ALL	20	20	100		0	0
AARAU	AML M1/M2	18	17	94.4444		0	1
AARAU	B-ALL	16	15	93.75		0	1
BELLINZONA	B-ALL	24	22	92		1	1
AARAU	MPAL	23	21	91.3043		0	2
LAUSANNE	AML M1/M2	20	18	89		0	2
BASEL	AML M3	18	16	88		1	1
BERN	B-ALL	24	21	87.5		1	3
LAUSANNE	T-ALL	16	14	86		0	2
SION	AML M0	24	21	86		0	3
SION	MPAL	29	24	84		1	4
BERN	AML M1/M2	27	21	81.4815		1	5
BASEL	T-ALL	19	15	81		0	6
BERN	AML M0	26	21	80.7692		1	4
BASEL	AML M1/M2	26	21	80		0	5
BERN	AML M1/M2	29	23	79.3103		1	5
BERN	PC dendr AL	33	26	78.7879		1	6
AARAU	AML M1/M2	29	22	75.8621		0	7
AARAU	T-ALL	16	12	75		0	4
BELLINZONA	AML M3	21	16	75		1	4
BERN	AML M4/M5	32	24	75		2	6
LAUSANNE	AML M1/M2	25	19	75		1	5
AARAU	B-ALL	15	11	73.3333		1	3
BASEL	AML M4/M5	25	18	73		1	6
SION	AML M4/M5	25	18	70		2	5
AARAU	AML M3	16	11	68.75		0	5
BERN	AML M3	28	19	67.8571		2	7
LAUSANNE	AML M1/M2	27	18	67		3	6
LAUSANNE	AML M4/M5	26	17	67		3	6
AARAU	AML M4/M5	15	10	66.6667		0	5
BERN	SMD (RCMD)	21	14	66.6667		2	5
BERN	MPAL	23	15	65.2174		0	8
BERN	AML M4/M5	28	18	64.2857		2	8
LAUSANNE	AML M4/M5	26	17	64		2	7
LAUSANNE	AML M1/M2	27	17	63		2	8
AARAU	AML M1/M2	18	11	61.1111		2	5
BERN	AML M4/M5	30	17	56.6667		3	10
AARAU	AML M4/M5	11	6	54.5455		1	4
AARAU	MPAL	23	12	52.1739		2	7
BERN	juvenile MM leukemia	28	degraded
LAUSANNE	AML M1/M2	25	degraded
	Sum (without deg)	941	720			40	181
	Mean(without deg)			77%
