# Supplementary material for: Using Digital RNA Counting and Flow Cytometry to Compare mRNA with Protein Expression in Acute Leukemias
Source: PLoS One. 2012 Nov 9;7(11):e49010. doi: 10.1371/journal.pone.0049010 (PMC3494663; doi:10.1371/journal.pone.0049010)
Supplement: Table S7 — nCounter values (mRNA counts) for normal and leukemic samples Samples (nBM, normal bone marrow; nPB, normal peripheral blood; AML, LLA-B, LLA-T) are ordered in columns and the genes tested in lines. 88 genes were tested. For several genes values were not obtained for all samples due to a restricted codeset used for the analysis (ND; not done). (XLS) [file pone.0049010.s010.xls]

## Sheet: Feuil1
Table S7: normalized mRNA counts from normal and leukemic samples
Antigens tested (88)		nBM	nBM	nBM	nBM	nBM	nBM	nBM	nBM	nBM	nBM	nBM	nPB	nPB	nPB	nPB	nPB	AML	AML	AML	AML	AML	AML	AML	AML	AML	AML	AML	AML	AML	AML	AML	AML	AML	AML	AML	AML	AML	AML	AML	AML	AML	AML	AML	AML	AML	AML	AML	AML
CD3		1112.61	141.737	3042.9	415.248	443.682	738.509	1022.7	682.601	709.546	492.699	425.901	6013.97	5538.27	6732.15	8058.9	6893.66	4420.03	2002.21	12010.7	1869.31	1071.37	675.691	34.4928	147.155	415.268	638.343	321.234	132.515	7278.99	321.802	787.391	407.128	1	173.79	118.503	1432.37	427.92	589.812	637.824	12380.9	203.797	8629.57	8048.42	6045.26	723.796	286.128	8.02947	183.218
CD4		671.765	536.576	940.856	688.531	1590.01	1117.88	702.334	580.361	632.578	400.318	531.642	3896.37	3925.48	3526.52	4759.49	3664.15	2543.96	1245.99	427.999	1368.26	1	400.673	847.23	381.093	94.7102	1503.11	253.909	685.033	1877.77	2968.62	948.517	602.801	1684.98	1222.97	703.907	404.511	1711.68	1215.78	884.072	273.377	161.993	1482.23	1404.86	875.887	2188.91	16751.1	4307.81	7261.24
CD5		162.693	89	2703.47	411.699	898.23	216.242	480.544	124.793	678.278	669.762	132.176	4743.41	5173.11	2452.52	3128.75	2430.31	3487.93	399.658	5991.99	779.843	142.85	246.568	34.4928	124.516	315.701	439.202	384.711	296.474	3966.52	8.04505	300.972	410.284	6.49317	1	11.8503	2122.02	276.502	160.447	167.53	2452.29	135.865	200.98	307.237	69.5148	355.764	206.324	1	106.074
CD8A		976.159	227.792	4275.54	770.162	1325.61	818.177	1306.09	1381.74	1217.05	1293.33	487.584	11689.1	9311.6	7393.58	7727.07	5346.67	5043.4	478.022	30695.6	2169.94	1392.79	599.824	114.257	294.31	2003.48	1050.26	861.752	197.649	14716.2	563.153	1571.74	1167.73	42.2056	347.58	470.457	1750.67	711.006	664.386	662.045	5303.51	449.399	1244.96	1686.79	861.984	965.645	613.131	148.545	532.78
CD8B		120.708	45.5583	369.197	3.54913	210.07	169.452	168.396	165.388	81.7782	1	14.6863	1270.56	2130.11	1617.55	1943.62	976.796	1208.16	43.1003	3036.12	178.58	71.425	139.88	1	18.866	99.5671	84.5668	44.2418	1	1645.68	1	97.2838	1	1	1	11.8503	92.8385	1	40.6767	8.07372	409.053	1	326.592	349.407	80.89	164.738	264.717	12.0442	282.06
CD25, IL2RA		1	1	1	1	1	1	1	40.5952	1	1	8.81175	1	1	193.189	66.3674	429.977	26.7161	188.074	896.123	6026.76	1	1	1	56.598	19.4277	1	459.73	552.519	696.251	1	82.0832	1	1	502.06	7138.62	79.5758	915.091	845.171	102.94	232.877	214.248	1	1	1	12066.2	1	1	1
CD26, DPP4		21	1	1	1	27	33	25	64.6516	4.81048	1	76.3685	1	1	311	446	864.628	125	1	1	2331.82	107.137	66	47.4276	1	82.5678	1	88.4835	56.1503	274.281	144.811	3.04012	18.9362	1	308.96	3907.04	1	513.504	110.731	113.032	141.751	1	21	17	10	202	99	1	1
CD28		73.4743	1	815.806	163.26	557.772	207.39	312.148	127.8	266.982	715.953	199.733	2879.93	3469.03	1296.66	2066.87	3220.16	881.63	270.357	7596.99	494.629	249.987	149.363	19.4022	15.0928	565.833	40.9194	269.298	215.617	5506.71	40.2252	428.657	243.014	1	109.423	24.8856	2049.08	144.835	250.84	106.977	1310.18	172.444	11.1655	146.992	1	178.758	13.6251	1	81.9661
TCRA		1878.84	460.645	3245.36	887.283	490.767	1513.69	1531.99	1100.58	755.245	662.064	819.493	10079.7	11928.6	13991.5	17805.4	13156.4	7916.86	340.884	18363.8	1012.38	1428.5	1709.38	68.9856	928.208	990.814	379.186	298.151	251.553	9905.75	233.306	1431.9	432.376	1	321.834	169.459	2871.36	1211.34	885.848	347.17	3152.95	109.737	526.177	504.833	591.508	825.443	502.184	44.1621	330.275
TCRB		3920.38	1113.65	7556.62	1607.76	2500.92	2679.63	3597.92	2310.92	2299.41	1993.89	1630.17	32272.1	33868.7	22514.7	32159.8	22386.9	15578.4	2503.74	20771.3	4183.14	2428.45	4262.78	523.86	1060.27	5612.18	2226.02	4108.71	920.865	25223.3	603.379	2733.07	1486.49	51.9454	952.627	771.454	5092.85	7129.81	1898.25	1745.94	4147.23	1504.96	1168.2	1062.68	1031.35	2127.57	1370.3	277.017	1195.74
CD2		41.9853	1	166.734	1	126.766	110.018	102.68	154.863	93.8044	84.6826	108.678	1	669.462	1283.56	1659.19	1808.71	938.031	23.5093	3049.49	159.309	107.137	85.3505	2.1558	1	116.566	1	109.643	22.4601	1814.47	1	106.404	66.2766	1	1	31.9958	450.93	184.335	122.03	133.216	1018.58	1	348.923	337.359	32.8615	78.864	1	20.0737	1
CD7		435.598	151.861	1476.79	287.48	898.23	423.631	542.152	184.934	365.597	485	226.168	2625.82	3621.18	2413.23	4143.22	2205.97	932.094	732.706	3276.87	1404.23	142.85	229.972	239.294	37.732	6433.01	120.03	196.203	327.918	4483.43	160.901	234.089	261.95	1	1	15.4054	192.308	2646.52	788.676	161.474	1356.76	36.579	558.277	645.801	200.961	532.77	145.984	1	40.9831
CD19		1	40.4963	291.785	1	94.1693	1167.2	65.7154	312.734	163.556	1	431.776	1	760.752	527.177	1033.44	373.893	1000.37	3.91821	13.375	1950.25	1	87.7213	407.446	203.753	43.7124	1	1	1	84.3941	16.0901	167.207	1	1	1	16.5904	1	164.585	101.692	76.7004	176.176	1	120.03	165.065	70.7787	162.986	369.825	12.0442	1
CD20, MS4A1		157.445	40.4963	1006.36	181.006	123.145	1934.79	644.833	479.625	252.55	1	252.604	4150.48	5416.55	3297.31	6485.05	1645.13	445.268	1	1029.87	298.062	1	436.236	601.468	150.928	203.991	1	40.3946	13.4761	411.421	1	349.614	1	1	1	78.2119	145.889	1639.26	433.885	88.8109	291.602	1	1	116.871	221.183	750.084	190.752	1	1
CD21, CR2		37	106	29.7739	42.5896	105.035	180.834	115.002	112.765	31.2681	1	35.247	1	1	130.976	274.951	177.599	68	47.0185	1	395.703	1	104	62.5182	117	94.7102	106	50.0124	42.6742	1	217.216	45.6018	12.6241	71	1	1	1	1	117.51	74.6819	56.7004	26.1278	96.3029	95.1834	83.4178	117.42	181.02	192.707	38.5723
CD22		293.897	187.295	655.027	102.925	411.085	1915.82	431.258	454.065	254.955	1	472.897	1948.19	2282.26	1502.95	2446.11	696.376	353.246	74.446	334.374	537.025	71.425	365.11	437.628	158.474	162.707	35.4635	53.8595	300.966	84.3941	16.0901	304.012	1	1	1	61.6215	1	276.502	228.241	58.5345	299.702	1071.24	61.4105	145.787	183.266	385.557	177.127	317.164	175.986
CD23,FCER2		1	1	17.8644	17.7457	27.1642	131.515	69.8227	84.1975	36.0786	1	23.498	1	152.15	124.427	360.28	303.788	1	70.5278	107	196.567	35.7125	1	144.439	64.1444	60.7116	1	1.92355	125.777	1	1	170.247	1	1	1	4.74012	1	302.836	79.0936	300.746	107.326	1	1	1	1	42.0608	1	1	4975.83
CD79a		488.079	323.97	3584.78	269.734	847.524	2688.48	616.082	2539.46	1520.11	515.794	1920.96	3811.67	4047.2	2449.25	5053.41	4968.11	923.189	509.368	10753.5	9546.97	642.825	457.573	4833.31	396.186	1041.81	40.9194	517.436	619.899	2858.85	265.487	1270.77	527.057	38.959	984.811	1100.89	1989.4	7142.98	1333.29	546.995	3487.08	381.467	136.778	193.981	414.561	846.473	282.235	88.3242	245.898
CD79b		1	1	1	1	1	271.883	1	109.757	1	1	99.8665	1	1	137.524	66.3674	84.126	448.236	1	1	431.676	1	417.269	131.504	90.5568	19.4277	1	207.744	1	1	1	1	1	1	32.1834	270.187	1	197.502	131.069	270.47	50.6254	1	110.26	78.3154	39.1811	238.344	1	48.1768	77.1446
CD200		ND	ND	ND	ND	ND	ND	ND	162.381	96.2096	1	199.733	ND	ND	ND	ND	56.084	ND	2088.41	1899.25	2115.98	1	ND	306.124	ND	4.85693	ND	36.5475	1172.42	1	16.0901	428.657	25.2482	ND	1	4120.35	172.414	5095.54	569.474	1836.77	1648.36	935.377	ND	ND	ND	ND	ND	ND	1
kappa		91433.5	140350	49829.7	220323	155655	160169	118469	4491.03	9382.84	7667.62	10844.3	16686.6	16127.9	11270.5	30595.4	16423.3	85939.7	8792.47	77681.9	3062.84	4714.05	111804	13314.2	52251.3	28709.3	41028.5	54896.3	608.669	10433.2	8399.03	44957.3	102662	6963.93	8496.41	516.673	10935	13858	38552.5	76262.4	28317.8	5507.75	1667.85	1412.09	9014.18	74927.8	16778.4	22590.9	74246.9
lambda		41255.8	64703	19245.9	19527.3	86894.7	63810.2	65193.8	1913.99	3877.25	2009.29	3612.82	15162	15580.2	5229.21	19294	8337.82	29399.6	4599.98	24917.6	1026.51	1785.62	44007.7	3539.82	23144.8	12074.3	25962	21082.2	309.95	5063.64	2212.39	18049.2	39930.1	5028.96	2239.96	370.914	5072.96	2797.94	15186	28536.6	10517.9	3119.67	1572.95	1434.98	5324.83	63276.9	9658.28	11088.7	30701.1
IgD		718.998	4150.87	1429.15	1707.13	4009.44	1960.08	2098.79	741.239	353.57	269.445	622.697	2371.7	3012.58	1542.24	3536.44	1360.04	261.224	1629.98	2862.24	565.29	1	376.965	1226.65	373.547	1236.09	635.615	705.944	233.585	854.49	1	1468.38	1091.99	74.6715	1	142.204	921.754	1415.43	1138.95	98.9031	447.528	1118.27	18.144	21.6873	236.35	881.524	330.896	1	1
IgM		11740.1	9805.17	21961.3	4344.14	11794.7	39199.2	21846.3	8300.97	5058.22	1362.62	12066.2	23124.1	25378.7	13677.1	24840.4	13165.7	17899.8	28344.3	47133.4	24671	3856.95	11365.8	13930.8	4188.25	17953.6	8151.14	9294.62	7645.42	11709.7	1906.68	5882.63	5611.42	1129.81	3623.85	1423.22	9330.27	19309.1	17522.6	7607.46	6113.52	3563.84	1232.4	1259.07	2948.69	29184.9	1697.3	3978.6	14156
TCL1A		ND	ND	ND	ND	ND	ND	ND	2679.28	305.466	1	3545.26	ND	ND	ND	ND	1042.23	ND	1	494.874	1	1	ND	860.164	ND	29.1416	ND	1	1	1	1	221.929	1	ND	1	33.1808	1	26.3336	4.51963	1	68.8505	1	ND	ND	ND	ND	ND	ND	1
CD10, MME		4051.58	2748.69	2161.59	1643.25	240.856	2826.32	1281.45	1432.86	637.389	1624.37	3642.19	5421.04	5538.27	12671.9	11007.5	12567.5	1	168.483	615.249	1830.77	1	1	836.451	441.465	53.4262	16.3678	78.8657	1248.78	1	1	1216.05	517.589	90.9044	12.8733	82.952	185.677	263.336	517.498	1	182.251	146.316	1	1	1	1	11.6787	1	1
CD66b; CD67, CEACAM8		50728.8	48190.6	25843.8	58993.7	47403.4	53956.7	54527.4	50556.1	54074.6	39839.3	60351.7	1	1	527.177	692.118	453.346	8810.37	6163.35	3932.24	5614.36	178.562	1619.29	25725.2	31796.8	1663.5	22579.3	3196.95	5770	1	10828.6	50219.7	14965.9	39218.8	1718.59	254.781	1737.41	6984.98	8759.05	2821.77	1324.36	16047.7	99.0943	89.1591	73.3065	1691.19	1212.64	4078.97	971.54
Elastase, ELANE, ELA2		ND	ND	ND	ND	ND	ND	ND	10944.2	9784.52	5165.64	8186.12	ND	ND	ND	ND	1	ND	1673.08	5363.37	1395.24	499.975	ND	9705.41	ND	424.982	ND	6397.74	608.669	1	18688.6	6955.79	11320.7	ND	13008.5	1272.72	1472.15	1764.35	5005.49	16331.1	2490.77	5565.23	ND	ND	ND	ND	ND	ND	1263.24
Lactotransferrin, LTF		302819							267596	426872	465901	406639	2287	3043.01	2891.29	2446.11	2262.05	38209.9	55372.2	127838	28646.1	464.262	6619.4	166426	303524	33345.3	85098.7	16985	51245	147.69	20209.2	12592.2	65137.3	134701	10749.2	693.242	12553.1	7959.32	82826.8	15681.2	15260.5	210747	1427.79	1273.53	844.289	1761.3	11355.6	10904	5877.45
CD14		3505.77	4398.91	2572.47	1607.76	3924.33	6939.96	1010.37	4014.42	2412.46	4850	5234.18	10588	12658.9	22966.6	29324.9	36529.4	13868.6	12463.8	989.748	675.778	1	1389.32	429.004	1418.72	182.135	1012.07	1056.03	6758.25	13598	128.721	276.651	760.603	379.851	1216.53	2415.09	603.45	2686.02	6092.47	8608.61	1812.39	1865.53	22.3311	32.531	664.814	222.572	151.823	7061.92	1277.71
CD163		ND	ND	ND	ND	ND	ND	ND	521.724	158.746	1	628.572	ND	ND	ND	ND	1967.61	ND	724.869	1	74.5155	1	ND	66.8298	ND	143.279	ND	207.744	229.093	210.985	1	629.305	94.6809	ND	276.777	6214.29	1	5385.21	1111.83	940.589	16.2001	1	ND	ND	ND	ND	ND	ND	3379.9
CD11b, ITGAM, MAC-1		22792.8	23983.9	14339.1	17759.9	13263.4	28322.6	23476.8	12017.7	14032.2	13379.8	18857.1	5505.74	7485.8	10504.3	10704.1	5884.15	6895.72	3753.65	2888.99	2771.2	285.7	1714.12	5074.75	15938	1068.52	4585.7	1548.46	6039.52	2352.48	3169.75	6937.55	11175.5	9694.31	1242.28	4924.98	1425.73	3291.7	6020.15	2343.4	1427.64	6861.17	1632.96	2485.61	3043.48	3783.72	879.795	13726.4	11726
CD11c, ITGAX		7447.14	4581.14	14029.5	3439.11	3509.62	4823.07	4123.64	3393.46	3468.36	7236.51	5413.35	21768.9	21179.3	30979	24736.1	32958.7	4939.5	27317.8	2086.5	2262.44	1357.07	2313.95	3852.42	4056.19	2583.89	1383.08	2033.2	15493	4810.46	3555.91	3696.79	5409.43	889.565	1686.41	5464.17	5550.42	11488	2402.18	2630.01	3420.25	6636.47	375.442	920.507	1313.2	6757.77	8708.41	8972.94	17092.4
CD13, ANPEP		4660.37	3857.27	12749.2	4464.81	5021.76	5041.84	4140.07	6177.99	7759.31	10546.8	10859	7877.45	6968.49	8320.23	6731.55	15843.7	7949.52	22764.8	5844.86	3130.93	499.975	5595.2	11975.5	5014.58	3125.44	3390.85	13539.9	11616.4	3439.06	4014.48	11239.3	8900	4863.39	1995.37	4698.64	3302.4	2172.52	5260.85	14353.1	6733.17	14025.4	1501.77	3089.24	5406.99	387.31	363.986	955.507	2155.23
CD15, FUT4		1306.79	2065.31	958.721	3233.26	2682.01	1733.73	1877	1868.88	2299.41	1624.37	1744.73	84.7037	547.741	108.055	274.951	238.357	1128.01	1159.79	1203.75	1085.61	3071.27	1711.75	2468.39	2697.84	998.099	3180.8	2548.71	1138.73	210.985	7747.38	4812.51	2647.91	6249.68	6488.17	1499.06	4927.07	2139.6	1229.34	4238.7	797.856	2727.75	1183.55	1475.94	2387.52	3636.51	3902.63	4633.01	9175.39
CD33		1695.16	1376.87	720.529	1476.44	867.444	1477.02	985.732	1091.56	488.264	161.667	1148.47	931.741	1795.37	1977.73	2076.35	1014.19	2098.7	771.888	334.374	1147.28	964.237	1889.57	334.149	1248.93	3008.87	1265.77	315.463	545.781	590.758	1922.77	1480.54	896.312	3064.78	2877.19	3177.06	716.183	1830.18	1961.52	1281.7	2118.17	240.376	5358.07	4831.46	5562.45	3201.88	3118.21	5789.25	1665.84
CD64, FCGR1A		582.546	2040	53.5931	70.9826	21.7314	75.8742	16.4289	172.906	1	1	117.49	1	1	1123.12	834.333	658.987	77.1798	19.5911	1	132.329	35.7125	75.8671	291.033	71.6908	801.394	521.04	186.585	274.013	1	56.3153	1	290.355	90.9044	1	238.191	1	26.3336	162.707	68.6266	81.0006	182.895	1	87.9542	401.922	87.6266	136.251	188.693	1077.61
CD114, CSF3R		ND	ND	ND	ND	ND	ND	ND	14200.8	13810.9	19061.3	16671.8	ND	ND	ND	ND	63005.7	ND	17106.9	11489.1	6732.09	11606.6	ND	16062.9	ND	38003.1	ND	19250.9	38218.1	5095.29	15969.4	17559.7	15638.1	ND	21099.4	4671.39	4509.3	8571.57	9353.38	30609.5	21505.7	13570.8	ND	ND	ND	ND	ND	ND	15474.7
CD116, CSF2RA		ND	ND	ND	ND	ND	ND	ND	2342.49	1991.54	2894.61	3272.1	ND	ND	ND	ND	5669.16	ND	8334.04	1725.37	865.921	321.412	ND	1731.11	ND	420.125	ND	415.488	2850.19	632.955	1086.08	1137	2114.54	ND	798.147	4983.05	2360.75	3054.69	1640.63	2208.16	2664.92	1912.56	ND	ND	ND	ND	ND	ND	3382.31
CD300E, IREM2		351.627	577.072	1321.96	926.323	2310.77	1119.15	607.868	460.079	2337.89	3210.24	234.98	4404.59	3742.9	3477.4	4740.53	2963.1	2698.32	8400.65	1	155.455	1	189.668	351.396	211.299	1	919.323	75.0186	981.507	2668.96	120.676	24.321	789.007	165.576	971.937	867.441	285.147	395.003	589.812	1081.88	172.126	120.188	47.4536	127.714	1	148.965	1	3681.51	10790.6
MPO		44908.5	41291	14303.4	60420.4	73265.5	40462.5	44776.9	164071	122852	90479.5	123934	1	1	32.7439	1	443.998	11211.8	49263.7	96353.3	68590.2	172634	31717.2	354963	41271.3	312269	35638.1	499076	21474.1	1424.15	580595	109967	198041	68347.1	559308	53728	69483	103471	151604	531699	478683	130796	198163	177256	437184	11759.5	408.754	84104.7	1212.62
CD34		1	1	1	1	27.1642	78.4034	1	108.254	43.2943	1	70.494	1	1	1	1	1	5548.04	2691.81	1457.87	6179.64	1	5282.25	612.247	1603.61	5561.19	512.856	5672.56	3306.13	2036.01	265.487	24.321	580.709	3.24659	25.7467	491.787	1	4364.79	2808.95	4503.12	226.802	1457.93	1081.66	915.688	7.58343	1	1	1	16.8754
CD117		1	1	1	1	1	15.1748	1	458.576	175.583	53.8889	326.035	1	1	1	1	46.7367	2556	8455.5	2354	405.981	6106.83	2475	883.878	524	2955.44	25	4283.76	2560.45	1	2019.31	3411.01	833.192	1	4093.72	1452.85	2261.28	1705.1	10838.1	6172.36	1257.53	1740.11	39	112	1	1	218	80	40.9831
CD123, IL3RA		351.627	404.963	410.88	390.404	483.523	652.519	702.334	628.474	938.044	669.762	734.313	1	121.72	350.36	1080.84	1014.19	2279.77	4302.2	655.374	1259.05	1642.77	1500.75	1000.29	1694.17	1002.96	390.098	1077.19	1042.15	791.194	3354.78	656.666	2180.82	1035.66	1802.27	8674.41	3262.61	5187.71	860.99	2137.52	5119.24	1651.28	3655.32	4003.73	4112.75	6081.29	2368.83	2143.87	1675.48
CD133, PROM1		115.46	111.365	1	166.809	244.478	375.578	28.7505	357.839	204.445	53.8889	452.337	1	1	1	1	1	11381	14109.5	6406.61	1040.65	1	21733.6	2921.11	3543.04	10772.7	1800.45	7623.05	1554.24	1	579.243	2872.91	2111.38	282.453	1	17.7754	1	3173.19	2822.51	3037.74	28.3502	3323.46	1	1	1	1	39222.9	554.034	16629.5
TdT, DNTT		724.247	845.36	303.694	727.572	287.941	1675.56	550.367	657.041	418.512	130.873	787.183	1	1	1074	957.587	214.989	3087.19	458.431	1	1600.8	35.7125	561.891	204.801	1573.42	75.2824	158.222	398.176	62.8883	1	1174.58	431.697	527.057	1210.98	521.37	530.893	1	6629.47	411.287	633.787	14.1751	188.121	138.174	118.076	315.976	250.612	990.742	1232.52	568.941
CD235a, glycophorine, GYPA		115.46	126.551	17.8644	223.595	4717.52	4921.71	205.361	1986.16	110.641	1	464.086	1	1	1	1	1	1620.78	1	40.1249	21.8407	1	395.931	1	7282.28	563.404	7196.36	473.194	1	1	176.991	440.817	1	1370.06	1	1	1	1	691.504	36.3317	60.7504	501.655	477.327	571.1	141.557	101.647	650.114	991.64	159.111
ALAS2		ND	ND	ND	ND	ND	ND	ND	20502.1	3304.8	1439.6	4270.76	ND	ND	ND	ND	46.7367	ND	2970.01	1658.5	480.496	7785.32	ND	161.685	ND	4198.82	ND	7369.14	1713.71	17226.9	5639.58	3274.21	1000.46	ND	431.257	2.37006	1538.47	447.671	7667.56	452.128	1522.81	10351.9	ND	ND	ND	ND	ND	ND	1571.82
Carbonic anhydrase 1, CA1		ND	ND	ND	ND	ND	ND	ND	216733	19650.8	20477.8	52109.8	ND	ND	ND	ND	70.105	ND	40361.5	36741.1	7179.18	8999.54	ND	3220.77	ND	42449.6	ND	43249.2	7178.25	93403.1	89758.6	64091.8	21678.8	ND	3488.68	456.236	2864.73	7353.65	172388	7441.95	22111.1	138357	ND	ND	ND	ND	ND	ND	19028.2
CD41, ITGA2B		2309.19	2237.42	768.167	3268.75	2857.68	5108.87	624.297	4704.54	235.714	400.318	1500.94	762.334	1278.06	1810.74	407.686	453.346	1953.24	544.632	5189.49	2468	499.975	742.075	2921.11	765.96	446.838	2359.69	553.984	1089.32	1297.56	756.234	6223.13	1114.08	318.165	57.93	226.341	1259.95	85.5841	13158.9	670.119	698.63	611.392	1776.72	1774.75	122.599	664.21	362.039	192.707	3905.45
CD42b, GP1BA		330.634	617.568	17.8644	684.982	613.912	1375.85	1	1217.86	40.8891	1	287.851	1	1	451.866	47.4053	88.7997	350.277	35.2639	80.2499	254.38	1	106.688	125.036	7.5464	38.8555	190.957	117.337	195.403	1	1	1240.37	85.2128	9.73976	1	73.4718	6.63132	59.2505	2982.96	179.64	8.10006	1	605.731	706.044	70.7787	122.677	239.413	1	1164.4
PRG2, major basic protein eosinophil		ND	ND	ND	ND	ND	ND	ND	55062.2	13457.3	139996	193747	ND	ND	ND	ND	1	ND	110552	69911	420240	321.412	ND	50685	ND	5879.32	ND	5847.61	27019.5	1213.16	38093.3	121234	7852.2	ND	3469.37	805.82	895.228	1336.43	122069	197647	42717.7	37838.4	ND	ND	ND	ND	ND	ND	13010.9
CD203c. ENPP3		ND	ND	ND	ND	ND	ND	ND	3.00705	1	1	1	ND	ND	ND	ND	32.7157	ND	1	1	65.5222	1	ND	1	ND	1	ND	1	85.3484	1	1	1	1	ND	77.2401	30.8108	1	1	908.446	30.2765	376.653	1	ND	ND	ND	ND	ND	ND	1
Tryptase , TPSAB1		ND	ND	ND	ND	ND	ND	ND	667.566	517.127	554.286	431.776	ND	ND	ND	ND	79.4523	ND	206298	896.123	12964.4	40819.4	ND	3552.76	ND	3897.69	ND	6797.84	1794.56	1202.62	5004.02	650.586	1994.61	ND	27156.3	5186.87	81014.8	9987	39589.7	10907.6	5665.99	21926.5	ND	ND	ND	ND	ND	ND	356.794
CD85g; LILRA4		ND	ND	ND	ND	ND	ND	ND	1	1	1	1	ND	ND	ND	ND	46.7367	ND	1	1	3.85425	1	ND	1	ND	1	ND	1	1	1	1	1	78.9007	ND	1	1	1	1481.26	1	1	1	1	ND	ND	ND	ND	ND	ND	1
CD303, CLEC4C		1	511.266	1	227.144	43.4628	1258.25	4.10721	288.677	1	1	790.12	1	1	628.683	673.155	514.103	427.457	1	1	74.5155	1	30.821	1	603.712	1	2.72796	1	1	1	1	94.2437	224.078	126.617	1	59.2515	1	3113.94	67.7945	58.5345	1	1	34.8923	27.7116	1	154.223	109.001	891.271	7.23231
CD44		6318.79	5320.2	11427.2	4312.19	9114.5	8582.64	5692.6	6051.7	6260.84	7436.67	7037.65	19651.3	21940.1	18287.5	23683.7	20601.5	21497.5	55270.3	40499.4	9598.36	101709	37058.7	24804.6	9183.97	53817.2	10819.1	54773.2	21741.4	38441.5	13668.5	6633.54	19163.4	7252.87	19232.8	27235.5	112799	35833.4	17662.7	20442.7	54414.2	16376.9	51432.7	53415.9	62479.9	9984.18	24719.9	14027.5	30797.6
CD45, PTPRC, LCA		31063.9	25998.6	27582.6	29113.5	23611.1	34366	31112.2	30456.9	43664.7	52041.3	41761.8	85127.3	85265.1	90762.9	100689	143010	38759.1	76510.9	114717	34788.4	38640.9	30697.7	70628.3	27842.5	61143.9	19944.1	73331.7	68202.4	79520.3	48214	30696.1	57603.8	32521.1	76075	90036.2	164278	50902.8	29113.2	40283.8	72066.2	63475	19532.7	60307.7	18340.5	39731.7	28994.3	38176.1	45609.3
CD48, BLAST1		4376.97	4677.32	8348.61	3453.3	5211.91	6029.47	5240.81	3754.31	2794.89	3125.56	2658.21	29307.5	27387.1	20127.7	24982.6	14951.1	10493.5	11143.4	22483.3	5388.24	678.537	1955.95	648.896	4267.49	1612.5	4964.89	8638.68	4312.34	12986.1	506.838	984.999	1170.89	4785.47	811.021	431.351	3289.13	8209.49	1631.59	1501.71	4080.4	2111.13	1143.07	1056.66	666.078	1507.18	866.17	8928.77	294.114
CD58		5689.01	5598.61	12350.2	5408.88	7223.87	8858.32	4554.9	5955.47	6727.46	6897.78	7034.72	7792.74	6086.01	8290.76	7670.18	7132.02	7245.99	10963.2	6232.74	4811.39	8535.28	9144.36	12204	8376.51	4295.96	7403.68	4591.52	8121.58	3576.2	10177	4769.95	6589.79	7136	4737.39	6265.25	10616.7	4193.62	4939.96	7605.45	11143.7	12807.9	6459.27	11249.7	10503.1	4519.78	5549.33	6034.15	10320.5
CD61, ITGB3		1438	1923.57	393.016	1824.25	2207.55	4297.01	308.041	4008.4	310.276	608.175	1221.9	1101.15	1338.92	2210.22	398.205	504.756	1006.31	184.156	267.5	763.141	71.425	139.88	931.306	75.464	58.2832	1238.49	344.316	608.669	158.239	64.3604	4003.84	672.234	207.782	1	93.6173	928.385	118.501	5979.47	337.078	224.777	161.993	90.7201	131.329	1	113.915	114.84	1	2962.83
CD71, TFRC		3232.87	3224.52	3793.2	10672.2	21738.6	36761.1	5848.67	37991.1	9645.01	8475.96	12512.7	2032.89	3195.16	897.184	1260.98	2187.28	10122.4	24912	17521.2	10870.3	13927.9	6384.69	15782.6	27446.3	21253.9	26024.7	27299.1	18273.5	5422.32	29452.9	19988.8	12942.9	8859.93	32131.9	13105.2	24960.3	12831	17228.8	12001.6	11232.8	35403.2	5191.98	14281.1	4743.44	12295.8	9288.45	8471.09	7184.09
CD110, MPL		1	1	1	53.237	85.1146	175.775	1	281.159	31.2681	1	79.3058	1	1	1	1	1	742.113	560.304	1885.87	758.002	1	4433.48	1237.43	369.774	11119.9	87.2947	5893.77	2562.7	569.66	378.117	404.336	208.298	1	547.117	238.191	1	263.336	3649.6	847.741	415.128	747.256	254.016	330.13	128.918	1	1	1	115.717
CD135, FLT3		383.116	258.164	1	358.462	244.478	555.147	156.074	345.811	113.046	1	284.913	1	1	134.25	170.659	135.536	17792.9	3910.38	1070	533.171	9928.07	14149.2	1243.9	5157.97	14731.1	422.834	21518.8	696.264	2995.99	4818.98	3556.94	3973.44	337.645	22386.7	25024.3	8832.92	23562	2521.96	5494.17	2008.81	1097.37	8096.42	13160.6	6368.82	27360.5	22434.8	6447.67	4481.62
Ki67, MKI67		ND	ND	ND	ND	ND	ND	ND	17510.1	6722.65	5188.73	9551.94	ND	ND	ND	ND	350.525	ND	12428.6	5711.11	8697.75	999.949	ND	5339.92	ND	9832.86	ND	7782.7	1354.34	485.266	5631.53	6612.26	9588.02	ND	2143.41	782.119	1883.3	12317.5	10887.8	4287.15	5287.31	9991.29	ND	ND	ND	ND	ND	ND	10814.7
HLA-DR A		12548.4	18031	43535.4	19761.6	27336.3	21545.8	13442.9	14345.1	17931.1	12302.1	11226.2	83517.9	84565.2	62668.6	76588	55523.2	145249	116610	47895.8	109163	1464.21	75108.4	19913.1	29287.6	69544	38477.9	79408.2	81157.4	30561.2	10193.1	15574.5	53387.4	5525.69	7492.29	53129.6	19045.2	207824	24306.6	32585.5	20829.3	28792.9	44173.7	38951.7	1549.55	88939.3	310875	51224	219136
HLA-DR B		2965.21	4171.12	9200.15	5071.71	6014.16	4184.46	2599.87	5555.53	9029.27	5258.02	6030.18	20667.7	20814.2	14263.3	18601.8	28313.1	37280.8	50082.6	19233.2	30646.4	499.975	15026.4	8323.55	9474.51	26909.8	8437.58	23076.9	33822.7	19632.2	2220.43	9637.18	26245.5	590.879	2941.56	38037.1	7838.22	78263.3	16772.4	16629.8	6520.55	10184.6	4517.86	4571.21	262.892	16303.8	51510.8	11562.4	122371
CD1a		1	1	1	1	1	20.2331	1	1	1	1	1	1	1	22.9207	1	18.6947	1	1	1	23.1255	1	1	1	1	1	1	1	1	1	64.3604	1	1	1	1	1	1	1	1	26.2396	1	1	1	1	1	1	1	48.1768	1
CD9		1228.07	1316.13	780.077	1203.16	1052.16	2214.26	558.581	3004.05	666.252	531.191	1906.28	1	639.032	1404.71	1147.21	2425.63	2825.97	1465.41	1203.75	778.558	178.562	303.468	980.889	1505.51	133.566	575.6	246.215	2940.03	1656.23	1456.15	3240.77	1420.21	94.151	1673.53	7809.34	11565	2106.69	4711.72	4505.14	5260.99	355.339	8797.06	7639.97	12524	460.916	2059.34	168.619	7654.19
CD16a, FCGR3A		12553.6	17869	5365.26	3765.63	2138.73	2754.24	3125.59	3855.04	637.389	2748.34	9707.61	19566.6	23644.2	62445.9	38379.3	77428.6	2541	78.3642	1257.25	1417.08	107.137	265.535	252.229	701.815	269.56	330.083	288.533	3611.59	6297.91	48.2703	1623.42	1489.65	922.03	946.191	1121.04	205.571	671.506	3364.87	940.589	1322.33	26.1278	315.427	331.334	1012.39	562.563	194.645	517.901	781.089
CD27		1	1	1	1	1	48.0537	1	168.395	161.151	1	226.168	1	1	383	398	2981.8	163	94.0371	682.124	621.819	35.7125	5	112.102	1	264.703	1	211.591	2.24601	1234.26	1	419.537	407.128	1	6.43667	10.6653	179.046	125.084	375.13	450.11	405.003	1	1	1	1	1	1	1	344.74
CD30, TNFRSF8		10.4963	1	250.101	1	1	173.246	36.9649	40.5952	16.8367	1	132.176	1	1	1385.07	967.068	537.472	187.013	1	1	50.1052	1	42.6752	1	60.3712	1	229.149	19.2355	235.831	1	1	12.1605	1	9.73976	141.607	55.6964	1	1	203.383	1	26.3252	15.6767	1	1.20485	1	50.8234	44.7683	28.1032	1
CD36		5531.56	5036.73	2244.95	6824.98	13676.3	23546.3	5425.63	20475	2883.88	2571.27	10101.2	5929.26	6359.89	9060.24	10533.5	9838.07	8071.22	1347.87	3999.12	9553.4	357.125	3603.69	467.809	22141.1	5413.05	19946.8	4403.02	2284.19	6456.15	4939.66	14981.7	5216.92	4191.34	1969.62	91025.6	709.551	4641.29	14476.4	3120.49	2976.77	5241.25	10624	13034.1	556.118	12478	2754.23	20965	5378.42
CD38		892.188	997.221	351.332	1983.96	1070.27	2099.19	722.87	1686.96	938.044	669.762	2170.63	1	1	363.458	341.318	789.85	2336.17	1802.38	855.998	4690.62	4535.48	7814.31	3302.69	1203.65	9196.6	1535.84	13268.7	875.944	2152.05	2566.37	3459.66	2676.31	1223.96	5207.27	2348.73	470.824	11382.7	2763.76	6337.87	1028.71	3130.12	893.244	1014.49	1420.63	3604.96	3844.24	1935.1	3015.87
CD56, NCAM1		1	1	1	1	1	6.32285	1	27.0635	1	1	38.1843	1	1	229.207	293.913	294.441	1	1	53.4999	1	1	18.9668	79.7646	45.2784	1	1	28.8533	1	601.308	1	1	1	1	514.934	1.18503	1	1	795.455	1	228.827	15.6767	1	33.7359	1	1	5267.09	638.343	2784.44
CD57		1	1	1	1	1	1	1	34.5811	1	1	8.81175	1	1	1	1	126.189	1	1	1	62.9527	1	1	4.3116	1	1	1	19.2355	1	10.5493	1	1	1	1	1	39.106	1	1	49.716	1	95.1757	1	1	1	1	1	1	1	1
CD68		ND	ND	ND	ND	ND	ND	ND	3626.51	3639.13	4372.7	3369.03	ND	ND	ND	ND	8389.23	ND	15022.4	1484.62	1609.79	1678.49	ND	7696.21	ND	1338.08	ND	3235.42	6605.52	7268.44	3580.05	3274.21	6075.36	ND	3610.97	6708.45	4038.47	5233.8	4205.52	19534.4	4169.51	4817.98	ND	ND	ND	ND	ND	ND	23025.3
CD90		1	1	1	1	1	1	1	1	1	1	1	1	1	1	1	1	1	1	1	215.838	1	1	1	1	41.2839	1	148.114	38.1822	1	1	72.9629	1	1	1	1	1	1	320.894	18.1659	22.2752	1	1	1	1	1	1	1	16.8754
CD96, TACTILE		829.21	369.529	1048.04	1178.31	400.22	1088.8	973.41	857.01	748.03	338.73	1145.53	3981.08	3377.74	2612.97	4522.47	3701.54	6171.41	180.238	3450.74	3477.82	214.275	315.323	823.516	1452.68	20059.1	1863.2	246.215	98.8245	11161.1	973.451	7220.29	312.447	35.7124	148.043	5408.47	775.865	3403.61	397.728	5120.76	6500.3	653.196	8269.49	10061.7	5283.13	3477.02	173.234	48.1768	195.272
CD99, MIC2		4838.81	4059.75	13475.7	5394.68	15206.5	11916.1	4953.3	6910.21	5755.74	5127.15	3668.63	23801.7	22974.7	20586.1	23437.2	13334	47836.6	100314	40980.9	26460.7	215489	48512.3	25873.9	19673.5	67059.7	22082.8	49127.6	20816	31046.5	14223.6	9734.46	18383.9	16930.9	240378	235587	276937	68816.2	20869.4	52299.5	88047.6	7200.84	131488	124235	132548	52851.1	38136.8	21386.5	9664.77
CD143		1	1	1	1	1	1	1	1	1	1	1	1	1	1	1	1	1	15.6728	1	147.746	1	24	90.5436	1	1	1	1	1	1	1	1	1	1	1	46.2161	1	1	119.77	119.087	87.0756	1	1	1	1	9	66	1	860.644
CD150, SLAMF1		1	1	1	21.2948	43.4628	45.5245	57.501	139.828	254.955	15.3968	111.616	1	1	137.524	237.027	635.619	166.233	1982.62	1912.62	377.716	71.425	54.5295	66.8298	1	313.272	24.5516	313.539	1291.46	474.717	32.1802	155.046	290.355	1	128.733	315.218	424.405	2567.52	117.51	121.106	1178.56	428.497	1	4.81941	1	108.657	103.162	1	383.312
CD231, TSPAN7		110.211	232.854	1	156.162	258.966	373.048	119.109	396.931	293.439	161.667	370.094	1	1	153.896	18.9621	112.168	581.817	1512.43	26.75	862.067	35.7125	184.926	144.439	384.867	471.122	510.129	271.221	92.0865	1	1858.41	252.33	536.525	688.276	244.594	72.2868	1	2699.19	334.453	1009.22	20.2501	297.857	178.649	151.811	243.934	148.965	114.84	750.756	561.709
CD243, ABCB1, MDR1		15.7445	1	893.218	106.474	447.304	145.426	16.4289	109.757	139.504	15.3968	32.3098	1	273.871	537	1014.47	537.472	1193.32	2460.64	19540.8	407.266	71.425	2716.99	689.856	335.815	10182.6	204.597	1419.58	1273.49	3312.47	64.3604	139.846	356.631	1	1	2285.92	1604.78	618.839	973.981	589.382	9434.54	679.324	185.627	815.685	1	108.657	11.6787	1	28.9292
CD244, NKR2B4		540.561	329.032	136.96	376.208	253.533	663.9	373.757	610.432	281.413	153.968	578.638	1	821.612	2357.56	2607.29	2262.05	3799.62	767.97	3437.37	1067.63	5321.16	3331.04	441.939	1339.49	3404.71	300.076	2142.84	1152.2	2542.37	740.144	1441.02	470.248	288.946	1853.76	3834.75	2446.96	1672.18	1905.03	1709.61	2371.29	1781.92	608.522	524.111	2522.76	1607.07	836.973	1232.52	621.978
CD304, NRP1		1	1	1	24.8439	677.295	249.12	1	78.1834	146.72	1	290.788	1	1	29.4695	1	56.084	2.96845	1	1	1215.37	1	163.588	135.815	15.0928	131.137	1	327.004	168.451	1	24.1351	231.049	754.291	1	64.3667	1	311.672	5497.13	456.483	2157.7	656.105	52.2557	609.918	1350.64	79.6261	150.718	29.1967	172.634	378.491
CLL-1 (CLEC12A)		5699.51	5461.94	1196.91	4574.83	1474.11	5508.47	3396.67	10251	4141.82	3225.64	14139.9	1016.44	1491.07	8189.26	6276.46	6594.54	7254.9	1872.91	2474.37	3948.04	4821.18	3281.25	5124.34	8965.13	1826.21	900.227	16604.1	2490.83	2046.56	7441.67	17529.3	6905.39	7126.26	21241	9443.5	2221.49	14950.9	10363.5	8624.75	433.353	6249.78	505.241	727.731	1900.91	1316.15	6362.94	5909.69	15612.1
Lysozyme, LYZ		424267	535715	285341	628750	567022	701567	523091	659836	690391	682696	903481	232935	236929	346293	340418	371687	383325	1.3405e+06	135328	152505	65925.2	417710	299486	641946	164043	629850	292802	257184	133300	4.77786e+06	305413	1.32053e+06	1.37185e+06	465861	49050.7	105385	402462	617016	1.5242e+06	91247.2	663151	34565.7	28152.6	768670	482800	191706	1.861e+06	1.17888e+06
[truncated: 56 more columns]

## Sheet: Feuil2
			Exp 1	Exp 1	Exp 1	Exp 1	Exp 1	Exp 1	Exp 1	Exp 2	Exp 2	Exp 2	Exp 2	Exp 1	Exp 1	Exp 1	Exp 1	Exp 2	Exp 1	Exp 2	Exp 2	Exp 2	Exp 2	Exp 1	Exp 2	Exp 1	Exp 2	Exp 1	Exp 2	Exp 2	Exp 2	Exp 2	Exp 2	Exp 2	Exp 1	Exp 2	Exp 2	Exp 2	Exp 2	Exp 2	Exp 2	Exp 2	Exp 2	Exp 1	Exp 1	Exp 1	Exp 1	Exp 1	Exp 1
			Run 1; 3	Run 1; 1	Run 3; 2	Run 3; 3	Run 3; 4	Run 4; 7	Run 4; 11	Run 1; 4	Run 1; 7	Run 1; 9	Run 2; 12	Run 1; 6	Run 2; 9	Run 3;7	Run 4; 12	Run 8; 6	Run 4; 2	Run 3; 1	Run 3; 8	Run 8; 9	Run 8; 7	Run 4; 1	Run 3; 12	Run 4; 4	Run 3; 7	Run 2; 12	Run 3; 2	Run 4; 10	Run 7; 6	Run 7; 7	Run 4; 4	Run 3; 3	Run 3; 12	Run 1; 6	Run 3; 10	Run 3; 11	Run 2; 9	Run 2; 10	Run 4; 12	Run 7; 2	Run 7; 5	Run 4; 6	Run 3, 9	Run 4; 10	Run 4; 8	Run 4; 9	Run 3; 10
											Mastocytose	Hodgkin	Hodgkin									moelle	moelle																								LMA M4
	94 probes			RLT buffer							systémique						mix 4 donors	mix 5 donors																AREB-II
			normal BM 1	normal BM 2	normal BM 3	normal BM 4	normal BM 5	normal BM 6	normal BM 7	normal BM 8	normal BM 9	normal BM 10	normal BM 11	normal PB 1	normal PB 2	normal PB 3	normal PB 4	normal PB 5	AL 1	AL 2	AL 3	AL 4	AL 5	AL 6	AL 7	AL 8	AL 9	AL 10	AL 11	AL 12	AL 13	AL 14	AL 15	AL 16	AL 17	AL 18	AL 19	AL 20	AL 21	AL 22	AL 23	AL 24	AL 25	AL 26	AL 27	AL 28	AL 29	AL 30	AL 31
	A completer		normal BM	normal BM	normal BM	normal BM	normal BM	normal BM	normal BM	normal BM	normal BM	normal BM	normal BM	normal PB	normal PB	normal PB	normal PB	normal PB	AL	AL	AL	AL	AL	AL	AL	AL	AL	AL	AL	AL	AL	AL	AL	AL	AL	AL	AL	AL	AL	AL	AL	AL	AL	AL	AL	AL	AL	AL	AL
	A completer	# ?	BM	BM	BM	BM	BM	BM	BM	BM	BM	BM	BM	BM	PB	PB	PB	PB	BM
	CD3D	0	1112.61	141.737	3042.9	415.248	443.682	738.509	1022.7	682.601	709.546	492.699	425.901	6013.97	5538.27	6732.15	8058.9	6893.66	4420.03	2002.21	12010.7	1869.31	1071.37	675.691	34.4928	147.155	415.268	638.343	321.234	132.515	7278.99	321.802	787.391	407.128	1	173.79	118.503	1432.37	427.92	589.812	637.824	12380.9	203.797	8629.57	8048.42	6045.26	723.796	286.128	8.02947
	CD3E	0	1112.61	177.171	3287.04	635.295	938.071	710.689	1326.63	1305.06	1260.35	1131.67	646.195	12197.3	10133.2	7337.91	8902.72	12282.4	4114.28	638.669	10940.7	2198.21	1464.21	761.042	196.178	75.464	1095.24	665.622	948.312	303.212	15908.3	233.306	1237.33	902.624	1	444.13	219.23	2692.32	1290.34	856.47	553.05	3302.8	250.827	527.572	613.27	194.641	660.705	521.648	4.01474
	CD3G	0	729.495	126.551	1673.3	234.243	217.314	512.151	599.653	617.949	411.296	200.159	358.345	6268.08	4716.66	4888.67	5546.42	5519.6	3084.22	207.665	4574.24	853.074	1107.09	464.686	56.0508	33.9588	378.841	267.34	234.674	62.8883	6445.6	563.153	468.178	375.567	25.9727	173.79	73.4718	1233.43	342.336	381.909	240.193	2365.22	120.188	755.07	814.48	452.478	397.825	321.164	104.383
	CD4	0	671.765	536.576	940.856	688.531	1590.01	1117.88	702.334	580.361	632.578	400.318	531.642	3896.37	3925.48	3526.52	4759.49	3664.15	2543.96	1245.99	427.999	1368.26	1	400.673	847.23	381.093	94.7102	1503.11	253.909	685.033	1877.77	2968.62	948.517	602.801	1684.98	1222.97	703.907	404.511	1711.68	1215.78	884.072	273.377	161.993	1482.23	1404.86	875.887	2188.91	16751.1	4307.81
	CD5	0	162.693	1	2703.47	411.699	898.23	216.242	480.544	124.793	678.278	669.762	132.176	4743.41	5173.11	2452.52	3128.75	2430.31	3487.93	399.658	5991.99	779.843	142.85	246.568	34.4928	124.516	315.701	439.202	384.711	296.474	3966.52	8.04505	300.972	410.284	6.49317	1	11.8503	2122.02	276.502	160.447	167.53	2452.29	135.865	200.98	307.237	69.5148	355.764	206.324	1
	CD8A	0	976.159	227.792	4275.54	770.162	1325.61	818.177	1306.09	1381.74	1217.05	1293.33	487.584	11689.1	9311.6	7393.58	7727.07	5346.67	5043.4	478.022	30695.6	2169.94	1392.79	599.824	114.257	294.31	2003.48	1050.26	861.752	197.649	14716.2	563.153	1571.74	1167.73	42.2056	347.58	470.457	1750.67	711.006	664.386	662.045	5303.51	449.399	1244.96	1686.79	861.984	965.645	613.131	148.545
	CD8B	0	120.708	45.5583	369.197	3.54913	210.07	169.452	168.396	165.388	81.7782	1	14.6863	1270.56	2130.11	1617.55	1943.62	976.796	1208.16	43.1003	3036.12	178.58	71.425	139.88	1	18.866	99.5671	84.5668	44.2418	1	1645.68	1	97.2838	1	1	1	11.8503	92.8385	1	40.6767	8.07372	409.053	1	326.592	349.407	80.89	164.738	264.717	12.0442
	CD25, IL2RA	0	1	1	1	1	1	1	1	40.5952	1	1	8.81175	1	1	193.189	66.3674	429.977	26.7161	188.074	896.123	6026.76	1	1	1	56.598	19.4277	1	459.73	552.519	696.251	1	82.0832	1	1	502.06	7138.62	79.5758	915.091	845.171	102.94	232.877	214.248	1	1	1	12066.2	1	1
	CD26, DPP4	0	21	1	1	1	27	33	25	64.6516	4.81048	1	76.3685	1	1	311	446	864.628	125	1	1	2331.82	107.137	66	47.4276	1	82.5678	1	88.4835	56.1503	274.281	144.811	3.04012	18.9362	1	308.96	3907.04	1	513.504	110.731	113.032	141.751	1	21	17	10	202	99	1
	CD28	0	73.4743	1	815.806	163.26	557.772	207.39	312.148	127.8	266.982	715.953	199.733	2879.93	3469.03	1296.66	2066.87	3220.16	881.63	270.357	7596.99	494.629	249.987	149.363	19.4022	15.0928	565.833	40.9194	269.298	215.617	5506.71	40.2252	428.657	243.014	1	109.423	24.8856	2049.08	144.835	250.84	106.977	1310.18	172.444	11.1655	146.992	1	178.758	13.6251	1
	TCRA	0	1878.84	460.645	3245.36	887.283	490.767	1513.69	1531.99	1100.58	755.245	662.064	819.493	10079.7	11928.6	13991.5	17805.4	13156.4	7916.86	340.884	18363.8	1012.38	1428.5	1709.38	68.9856	928.208	990.814	379.186	298.151	251.553	9905.75	233.306	1431.9	432.376	1	321.834	169.459	2871.36	1211.34	885.848	347.17	3152.95	109.737	526.177	504.833	591.508	825.443	502.184	44.1621
	TCRB	0	3920.38	1113.65	7556.62	1607.76	2500.92	2679.63	3597.92	2310.92	2299.41	1993.89	1630.17	32272.1	33868.7	22514.7	32159.8	22386.9	15578.4	2503.74	20771.3	4183.14	2428.45	4262.78	523.86	1060.27	5612.18	2226.02	4108.71	920.865	25223.3	603.379	2733.07	1486.49	51.9454	952.627	771.454	5092.85	7129.81	1898.25	1745.94	4147.23	1504.96	1168.2	1062.68	1031.35	2127.57	1370.3	277.017
	CD2	0	41.9853	1	166.734	1	126.766	110.018	102.68	154.863	93.8044	84.6826	108.678	1	669.462	1283.56	1659.19	1808.71	938.031	23.5093	3049.49	159.309	107.137	85.3505	2.1558	1	116.566	1	109.643	22.4601	1814.47	1	106.404	66.2766	1	1	31.9958	450.93	184.335	122.03	133.216	1018.58	1	348.923	337.359	32.8615	78.864	1	20.0737
	CD7	0	435.598	151.861	1476.79	287.48	898.23	423.631	542.152	184.934	365.597	485	226.168	2625.82	3621.18	2413.23	4143.22	2205.97	932.094	732.706	3276.87	1404.23	142.85	229.972	239.294	37.732	6433.01	120.03	196.203	327.918	4483.43	160.901	234.089	261.95	1	1	15.4054	192.308	2646.52	788.676	161.474	1356.76	36.579	558.277	645.801	200.961	532.77	145.984	1
	CD19	0	1	40.4963	291.785	1	94.1693	1167.2	65.7154	312.734	163.556	1	431.776	1	760.752	527.177	1033.44	373.893	1000.37	3.91821	13.375	1950.25	1	87.7213	407.446	203.753	43.7124	1	1	1	84.3941	16.0901	167.207	1	1	1	16.5904	1	164.585	101.692	76.7004	176.176	1	120.03	165.065	70.7787	162.986	369.825	12.0442
	CD20, MS4A1	0	157.445	40.4963	1006.36	181.006	123.145	1934.79	644.833	479.625	252.55	1	252.604	4150.48	5416.55	3297.31	6485.05	1645.13	445.268	1	1029.87	298.062	1	436.236	601.468	150.928	203.991	1	40.3946	13.4761	411.421	1	349.614	1	1	1	78.2119	145.889	1639.26	433.885	88.8109	291.602	1	1	116.871	221.183	750.084	190.752	1
	CD21, CR2	0	37	106	29.7739	42.5896	105.035	180.834	115.002	112.765	31.2681	1	35.247	1	1	130.976	274.951	177.599	68	47.0185	1	395.703	1	104	62.5182	117	94.7102	106	50.0124	42.6742	1	217.216	45.6018	12.6241	71	1	1	1	1	117.51	74.6819	56.7004	26.1278	96.3029	95.1834	83.4178	117.42	181.02	192.707
	CD22	0	293.897	187.295	655.027	102.925	411.085	1915.82	431.258	454.065	254.955	1	472.897	1948.19	2282.26	1502.95	2446.11	696.376	353.246	74.446	334.374	537.025	71.425	365.11	437.628	158.474	162.707	35.4635	53.8595	300.966	84.3941	16.0901	304.012	1	1	1	61.6215	1	276.502	228.241	58.5345	299.702	1071.24	61.4105	145.787	183.266	385.557	177.127	317.164
	CD23,FCER2	0	1	1	17.8644	17.7457	27.1642	131.515	69.8227	84.1975	36.0786	1	23.498	1	152.15	124.427	360.28	303.788	1	70.5278	107	196.567	35.7125	1	144.439	64.1444	60.7116	1	1.92355	125.777	1	1	170.247	1	1	1	4.74012	1	302.836	79.0936	300.746	107.326	1	1	1	1	42.0608	1	1
	CD79a	0	488.079	323.97	3584.78	269.734	847.524	2688.48	616.082	2539.46	1520.11	515.794	1920.96	3811.67	4047.2	2449.25	5053.41	4968.11	923.189	509.368	10753.5	9546.97	642.825	457.573	4833.31	396.186	1041.81	40.9194	517.436	619.899	2858.85	265.487	1270.77	527.057	38.959	984.811	1100.89	1989.4	7142.98	1333.29	546.995	3487.08	381.467	136.778	193.981	414.561	846.473	282.235	88.3242
	CD79b	0	1	1	1	1	1	271.883	1	109.757	1	1	99.8665	1	1	137.524	66.3674	84.126	448.236	1	1	431.676	1	417.269	131.504	90.5568	19.4277	1	207.744	1	1	1	1	1	1	32.1834	270.187	1	197.502	131.069	270.47	50.6254	1	110.26	78.3154	39.1811	238.344	1	48.1768
	CD200	32	?	?	?	?	?	?	?	162.381	96.2096	1	199.733	?	?	?	?	56.084	?	2088.41	1899.25	2115.98	1	?	306.124	?	4.85693	?	36.5475	1172.42	1	16.0901	428.657	25.2482	?	1	4120.35	172.414	5095.54	569.474	1836.77	1648.36	935.377	?	?	?	?	?	?
	kappa	0	91433.5	140350	49829.7	220323	155655	160169	118469	4491.03	9382.84	7667.62	10844.3	16686.6	16127.9	11270.5	30595.4	16423.3	85939.7	8792.47	77681.9	3062.84	4714.05	111804	13314.2	52251.3	28709.3	41028.5	54896.3	608.669	10433.2	8399.03	44957.3	102662	6963.93	8496.41	516.673	10935	13858	38552.5	76262.4	28317.8	5507.75	1667.85	1412.09	9014.18	74927.8	16778.4	22590.9
	lambda	0	41255.8	64703	19245.9	19527.3	86894.7	63810.2	65193.8	1913.99	3877.25	2009.29	3612.82	15162	15580.2	5229.21	19294	8337.82	29399.6	4599.98	24917.6	1026.51	1785.62	44007.7	3539.82	23144.8	12074.3	25962	21082.2	309.95	5063.64	2212.39	18049.2	39930.1	5028.96	2239.96	370.914	5072.96	2797.94	15186	28536.6	10517.9	3119.67	1572.95	1434.98	5324.83	63276.9	9658.28	11088.7
	IgD	0	718.998	4150.87	1429.15	1707.13	4009.44	1960.08	2098.79	741.239	353.57	269.445	622.697	2371.7	3012.58	1542.24	3536.44	1360.04	261.224	1629.98	2862.24	565.29	1	376.965	1226.65	373.547	1236.09	635.615	705.944	233.585	854.49	1	1468.38	1091.99	74.6715	1	142.204	921.754	1415.43	1138.95	98.9031	447.528	1118.27	18.144	21.6873	236.35	881.524	330.896	1
	IgM	0	11740.1	9805.17	21961.3	4344.14	11794.7	39199.2	21846.3	8300.97	5058.22	1362.62	12066.2	23124.1	25378.7	13677.1	24840.4	13165.7	17899.8	28344.3	47133.4	24671	3856.95	11365.8	13930.8	4188.25	17953.6	8151.14	9294.62	7645.42	11709.7	1906.68	5882.63	5611.42	1129.81	3623.85	1423.22	9330.27	19309.1	17522.6	7607.46	6113.52	3563.84	1232.4	1259.07	2948.69	29184.9	1697.3	3978.6
	TCL1A	32	?	?	?	?	?	?	?	2679.28	305.466	1	3545.26	?	?	?	?	1042.23	?	1	494.874	1	1	?	860.164	?	29.1416	?	1	1	1	1	221.929	1	?	1	33.1808	1	26.3336	4.51963	1	68.8505	1	?	?	?	?	?	?
	CD10, MME	0	4051.58	2748.69	2161.59	1643.25	240.856	2826.32	1281.45	1432.86	637.389	1624.37	3642.19	5421.04	5538.27	12671.9	11007.5	12567.5	1	168.483	615.249	1830.77	1	1	836.451	441.465	53.4262	16.3678	78.8657	1248.78	1	1	1216.05	517.589	90.9044	12.8733	82.952	185.677	263.336	517.498	1	182.251	146.316	1	1	1	1	11.6787	1
	CD66b; CD67, CEACAM8	0	50728.8	48190.6	25843.8	58993.7	47403.4	53956.7	54527.4	50556.1	54074.6	39839.3	60351.7	1	1	527.177	692.118	453.346	8810.37	6163.35	3932.24	5614.36	178.562	1619.29	25725.2	31796.8	1663.5	22579.3	3196.95	5770	1	10828.6	50219.7	14965.9	39218.8	1718.59	254.781	1737.41	6984.98	8759.05	2821.77	1324.36	16047.7	99.0943	89.1591	73.3065	1691.19	1212.64	4078.97
	Elastase, ELANE, ELA2	32	?	?	?	?	?	?	?	10944.2	9784.52	5165.64	8186.12	?	?	?	?	1	?	1673.08	5363.37	1395.24	499.975	?	9705.41	?	424.982	?	6397.74	608.669	1	18688.6	6955.79	11320.7	?	13008.5	1272.72	1472.15	1764.35	5005.49	16331.1	2490.77	5565.23	?	?	?	?	?	?
	Lactotransferrin, LTF	0	302819							267596	426872	465901	406639	2287	3043.01	2891.29	2446.11	2262.05	38209.9	55372.2	127838	28646.1	464.262	6619.4	166426	303524	33345.3	85098.7	16985	51245	147.69	20209.2	12592.2	65137.3	134701	10749.2	693.242	12553.1	7959.32	82826.8	15681.2	15260.5	210747	1427.79	1273.53	844.289	1761.3	11355.6	10904
	CD14	0	3505.77	4398.91	2572.47	1607.76	3924.33	6939.96	1010.37	4014.42	2412.46	4850	5234.18	10588	12658.9	22966.6	29324.9	36529.4	13868.6	12463.8	989.748	675.778	1	1389.32	429.004	1418.72	182.135	1012.07	1056.03	6758.25	13598	128.721	276.651	760.603	379.851	1216.53	2415.09	603.45	2686.02	6092.47	8608.61	1812.39	1865.53	22.3311	32.531	664.814	222.572	151.823	7061.92
	CD163	32	?	?	?	?	?	?	?	521.724	158.746	1	628.572	?	?	?	?	1967.61	?	724.869	1	74.5155	1	?	66.8298	?	143.279	?	207.744	229.093	210.985	1	629.305	94.6809	?	276.777	6214.29	1	5385.21	1111.83	940.589	16.2001	1	?	?	?	?	?	?
	CD11b, ITGAM, MAC-1	0	22792.8	23983.9	14339.1	17759.9	13263.4	28322.6	23476.8	12017.7	14032.2	13379.8	18857.1	5505.74	7485.8	10504.3	10704.1	5884.15	6895.72	3753.65	2888.99	2771.2	285.7	1714.12	5074.75	15938	1068.52	4585.7	1548.46	6039.52	2352.48	3169.75	6937.55	11175.5	9694.31	1242.28	4924.98	1425.73	3291.7	6020.15	2343.4	1427.64	6861.17	1632.96	2485.61	3043.48	3783.72	879.795	13726.4
	CD11c, ITGAX	0	7447.14	4581.14	14029.5	3439.11	3509.62	4823.07	4123.64	3393.46	3468.36	7236.51	5413.35	21768.9	21179.3	30979	24736.1	32958.7	4939.5	27317.8	2086.5	2262.44	1357.07	2313.95	3852.42	4056.19	2583.89	1383.08	2033.2	15493	4810.46	3555.91	3696.79	5409.43	889.565	1686.41	5464.17	5550.42	11488	2402.18	2630.01	3420.25	6636.47	375.442	920.507	1313.2	6757.77	8708.41	8972.94
	CD13, ANPEP	0	4660.37	3857.27	12749.2	4464.81	5021.76	5041.84	4140.07	6177.99	7759.31	10546.8	10859	7877.45	6968.49	8320.23	6731.55	15843.7	7949.52	22764.8	5844.86	3130.93	499.975	5595.2	11975.5	5014.58	3125.44	3390.85	13539.9	11616.4	3439.06	4014.48	11239.3	8900	4863.39	1995.37	4698.64	3302.4	2172.52	5260.85	14353.1	6733.17	14025.4	1501.77	3089.24	5406.99	387.31	363.986	955.507
	CD15, FUT4	0	1306.79	2065.31	958.721	3233.26	2682.01	1733.73	1877	1868.88	2299.41	1624.37	1744.73	84.7037	547.741	108.055	274.951	238.357	1128.01	1159.79	1203.75	1085.61	3071.27	1711.75	2468.39	2697.84	998.099	3180.8	2548.71	1138.73	210.985	7747.38	4812.51	2647.91	6249.68	6488.17	1499.06	4927.07	2139.6	1229.34	4238.7	797.856	2727.75	1183.55	1475.94	2387.52	3636.51	3902.63	4633.01
	CD33	0	1695.16	1376.87	720.529	1476.44	867.444	1477.02	985.732	1091.56	488.264	161.667	1148.47	931.741	1795.37	1977.73	2076.35	1014.19	2098.7	771.888	334.374	1147.28	964.237	1889.57	334.149	1248.93	3008.87	1265.77	315.463	545.781	590.758	1922.77	1480.54	896.312	3064.78	2877.19	3177.06	716.183	1830.18	1961.52	1281.7	2118.17	240.376	5358.07	4831.46	5562.45	3201.88	3118.21	5789.25
	CD64, FCGR1A	0	582.546	2040	53.5931	70.9826	21.7314	75.8742	16.4289	172.906	1	1	117.49	1	1	1123.12	834.333	658.987	77.1798	19.5911	1	132.329	35.7125	75.8671	291.033	71.6908	801.394	521.04	186.585	274.013	1	56.3153	1	290.355	90.9044	1	238.191	1	26.3336	162.707	68.6266	81.0006	182.895	1	87.9542	401.922	87.6266	136.251	188.693
	CD114, CSF3R	32	?	?	?	?	?	?	?	14200.8	13810.9	19061.3	16671.8	?	?	?	?	63005.7	?	17106.9	11489.1	6732.09	11606.6	?	16062.9	?	38003.1	?	19250.9	38218.1	5095.29	15969.4	17559.7	15638.1	?	21099.4	4671.39	4509.3	8571.57	9353.38	30609.5	21505.7	13570.8	?	?	?	?	?	?
	CD116, CSF2RA	32	?	?	?	?	?	?	?	2342.49	1991.54	2894.61	3272.1	?	?	?	?	5669.16	?	8334.04	1725.37	865.921	321.412	?	1731.11	?	420.125	?	415.488	2850.19	632.955	1086.08	1137	2114.54	?	798.147	4983.05	2360.75	3054.69	1640.63	2208.16	2664.92	1912.56	?	?	?	?	?	?
	CD300E, IREM2	0	351.627	577.072	1321.96	926.323	2310.77	1119.15	607.868	460.079	2337.89	3210.24	234.98	4404.59	3742.9	3477.4	4740.53	2963.1	2698.32	8400.65	1	155.455	1	189.668	351.396	211.299	1	919.323	75.0186	981.507	2668.96	120.676	24.321	789.007	165.576	971.937	867.441	285.147	395.003	589.812	1081.88	172.126	120.188	47.4536	127.714	1	148.965	1	3681.51
	MPO	0	44908.5	41291	14303.4	60420.4	73265.5	40462.5	44776.9	164071	122852	90479.5	123934	1	1	32.7439	1	443.998	11211.8	49263.7	96353.3	68590.2	172634	31717.2	354963	41271.3	312269	35638.1	499076	21474.1	1424.15	580595	109967	198041	68347.1	559308	53728	69483	103471	151604	531699	478683	130796	198163	177256	437184	11759.5	408.754	84104.7
	CD34	0	1	1	1	1	27.1642	78.4034	1	108.254	43.2943	1	70.494	1	1	1	1	1	5548.04	2691.81	1457.87	6179.64	1	5282.25	612.247	1603.61	5561.19	512.856	5672.56	3306.13	2036.01	265.487	24.321	580.709	3.24659	25.7467	491.787	1	4364.79	2808.95	4503.12	226.802	1457.93	1081.66	915.688	7.58343	1	1	1
	CD117	0	1	1	1	1	1	15.1748	1	458.576	175.583	53.8889	326.035	1	1	1	1	46.7367	2556	8455.5	2354	405.981	6106.83	2475	883.878	524	2955.44	25	4283.76	2560.45	1	2019.31	3411.01	833.192	1	4093.72	1452.85	2261.28	1705.1	10838.1	6172.36	1257.53	1740.11	39	112	1	1	218	80
	CD123, IL3RA	0	351.627	404.963	410.88	390.404	483.523	652.519	702.334	628.474	938.044	669.762	734.313	1	121.72	350.36	1080.84	1014.19	2279.77	4302.2	655.374	1259.05	1642.77	1500.75	1000.29	1694.17	1002.96	390.098	1077.19	1042.15	791.194	3354.78	656.666	2180.82	1035.66	1802.27	8674.41	3262.61	5187.71	860.99	2137.52	5119.24	1651.28	3655.32	4003.73	4112.75	6081.29	2368.83	2143.87
	CD133, PROM1	0	115.46	111.365	1	166.809	244.478	375.578	28.7505	357.839	204.445	53.8889	452.337	1	1	1	1	1	11381	14109.5	6406.61	1040.65	1	21733.6	2921.11	3543.04	10772.7	1800.45	7623.05	1554.24	1	579.243	2872.91	2111.38	282.453	1	17.7754	1	3173.19	2822.51	3037.74	28.3502	3323.46	1	1	1	1	39222.9	554.034
	TdT, DNTT	0	724.247	845.36	303.694	727.572	287.941	1675.56	550.367	657.041	418.512	130.873	787.183	1	1	1074	957.587	214.989	3087.19	458.431	1	1600.8	35.7125	561.891	204.801	1573.42	75.2824	158.222	398.176	62.8883	1	1174.58	431.697	527.057	1210.98	521.37	530.893	1	6629.47	411.287	633.787	14.1751	188.121	138.174	118.076	315.976	250.612	990.742	1232.52
	CD235a, glycophorine, GYPA	0	115.46	126.551	17.8644	223.595	4717.52	4921.71	205.361	1986.16	110.641	1	464.086	1	1	1	1	1	1620.78	1	40.1249	21.8407	1	395.931	1	7282.28	563.404	7196.36	473.194	1	1	176.991	440.817	1	1370.06	1	1	1	1	691.504	36.3317	60.7504	501.655	477.327	571.1	141.557	101.647	650.114	991.64
	ALAS2	32	?	?	?	?	?	?	?	20502.1	3304.8	1439.6	4270.76	?	?	?	?	46.7367	?	2970.01	1658.5	480.496	7785.32	?	161.685	?	4198.82	?	7369.14	1713.71	17226.9	5639.58	3274.21	1000.46	?	431.257	2.37006	1538.47	447.671	7667.56	452.128	1522.81	10351.9	?	?	?	?	?	?
	Carbonic anhydrase 1, CA1	32	?	?	?	?	?	?	?	216733	19650.8	20477.8	52109.8	?	?	?	?	70.105	?	40361.5	36741.1	7179.18	8999.54	?	3220.77	?	42449.6	?	43249.2	7178.25	93403.1	89758.6	64091.8	21678.8	?	3488.68	456.236	2864.73	7353.65	172388	7441.95	22111.1	138357	?	?	?	?	?	?
	CD41, ITGA2B	0	2309.19	2237.42	768.167	3268.75	2857.68	5108.87	624.297	4704.54	235.714	400.318	1500.94	762.334	1278.06	1810.74	407.686	453.346	1953.24	544.632	5189.49	2468	499.975	742.075	2921.11	765.96	446.838	2359.69	553.984	1089.32	1297.56	756.234	6223.13	1114.08	318.165	57.93	226.341	1259.95	85.5841	13158.9	670.119	698.63	611.392	1776.72	1774.75	122.599	664.21	362.039	192.707
	CD42b, GP1BA	0	330.634	617.568	17.8644	684.982	613.912	1375.85	1	1217.86	40.8891	1	287.851	1	1	451.866	47.4053	88.7997	350.277	35.2639	80.2499	254.38	1	106.688	125.036	7.5464	38.8555	190.957	117.337	195.403	1	1	1240.37	85.2128	9.73976	1	73.4718	6.63132	59.2505	2982.96	179.64	8.10006	1	605.731	706.044	70.7787	122.677	239.413	1
	PRG2, major basic protein eosinophil	32	?	?	?	?	?	?	?	55062.2	13457.3	139996	193747	?	?	?	?	1	?	110552	69911	420240	321.412	?	50685	?	5879.32	?	5847.61	27019.5	1213.16	38093.3	121234	7852.2	?	3469.37	805.82	895.228	1336.43	122069	197647	42717.7	37838.4	?	?	?	?	?	?
	CD203c. ENPP3	32	?	?	?	?	?	?	?	3.00705	1	1	1	?	?	?	?	32.7157	?	1	1	65.5222	1	?	1	?	1	?	1	85.3484	1	1	1	1	?	77.2401	30.8108	1	1	908.446	30.2765	376.653	1	?	?	?	?	?	?
	Tryptase , TPSAB1	32	?	?	?	?	?	?	?	667.566	517.127	554.286	431.776	?	?	?	?	79.4523	?	206298	896.123	12964.4	40819.4	?	3552.76	?	3897.69	?	6797.84	1794.56	1202.62	5004.02	650.586	1994.61	?	27156.3	5186.87	81014.8	9987	39589.7	10907.6	5665.99	21926.5	?	?	?	?	?	?
	CD85g; LILRA4	32	?	?	?	?	?	?	?	1	1	1	1	?	?	?	?	46.7367	?	1	1	3.85425	1	?	1	?	1	?	1	1	1	1	1	78.9007	?	1	1	1	1481.26	1	1	1	1	?	?	?	?	?	?
	CD303, CLEC4C	0	1	511.266	1	227.144	43.4628	1258.25	4.10721	288.677	1	1	790.12	1	1	628.683	673.155	514.103	427.457	1	1	74.5155	1	30.821	1	603.712	1	2.72796	1	1	1	1	94.2437	224.078	126.617	1	59.2515	1	3113.94	67.7945	58.5345	1	1	34.8923	27.7116	1	154.223	109.001	891.271
	CD44	0	6318.79	5320.2	11427.2	4312.19	9114.5	8582.64	5692.6	6051.7	6260.84	7436.67	7037.65	19651.3	21940.1	18287.5	23683.7	20601.5	21497.5	55270.3	40499.4	9598.36	101709	37058.7	24804.6	9183.97	53817.2	10819.1	54773.2	21741.4	38441.5	13668.5	6633.54	19163.4	7252.87	19232.8	27235.5	112799	35833.4	17662.7	20442.7	54414.2	16376.9	51432.7	53415.9	62479.9	9984.18	24719.9	14027.5
	CD45, PTPRC, LCA	0	31063.9	25998.6	27582.6	29113.5	23611.1	34366	31112.2	30456.9	43664.7	52041.3	41761.8	85127.3	85265.1	90762.9	100689	143010	38759.1	76510.9	114717	34788.4	38640.9	30697.7	70628.3	27842.5	61143.9	19944.1	73331.7	68202.4	79520.3	48214	30696.1	57603.8	32521.1	76075	90036.2	164278	50902.8	29113.2	40283.8	72066.2	63475	19532.7	60307.7	18340.5	39731.7	28994.3	38176.1
	CD45 RA	32	?	?	?	?	?	?	?	10559.3	19213.1	28984.5	14580.5	?	?	?	?	52176.8	?	73701.6	104592	23947.7	26570.1	?	61563.2	?	59470.7	?	56265.9	46824.8	74182.4	20008	14814.5	43234.4	?	41452.2	67710.2	139768	33608.2	9934.15	26594.8	63362.7	32309.7	?	?	?	?	?	?
	CD45 RO	32	?	?	?	?	?	?	?	1320.1	1024.63	531.191	2382.11	?	?	?	?	5739.26	?	74.446	909.498	542.164	1499.92	?	485.055	?	131.137	?	71.1715	651.343	126.591	1399.84	905.956	552.305	?	720.907	405.28	431.036	92.1675	1376.23	355.244	240.977	3354.82	?	?	?	?	?	?
	CD48, BLAST1	0	4376.97	4677.32	8348.61	3453.3	5211.91	6029.47	5240.81	3754.31	2794.89	3125.56	2658.21	29307.5	27387.1	20127.7	24982.6	14951.1	10493.5	11143.4	22483.3	5388.24	678.537	1955.95	648.896	4267.49	1612.5	4964.89	8638.68	4312.34	12986.1	506.838	984.999	1170.89	4785.47	811.021	431.351	3289.13	8209.49	1631.59	1501.71	4080.4	2111.13	1143.07	1056.66	666.078	1507.18	866.17	8928.77
	CD58	0	5689.01	5598.61	12350.2	5408.88	7223.87	8858.32	4554.9	5955.47	6727.46	6897.78	7034.72	7792.74	6086.01	8290.76	7670.18	7132.02	7245.99	10963.2	6232.74	4811.39	8535.28	9144.36	12204	8376.51	4295.96	7403.68	4591.52	8121.58	3576.2	10177	4769.95	6589.79	7136	4737.39	6265.25	10616.7	4193.62	4939.96	7605.45	11143.7	12807.9	6459.27	11249.7	10503.1	4519.78	5549.33	6034.15
	CD61, ITGB3	0	1438	1923.57	393.016	1824.25	2207.55	4297.01	308.041	4008.4	310.276	608.175	1221.9	1101.15	1338.92	2210.22	398.205	504.756	1006.31	184.156	267.5	763.141	71.425	139.88	931.306	75.464	58.2832	1238.49	344.316	608.669	158.239	64.3604	4003.84	672.234	207.782	1	93.6173	928.385	118.501	5979.47	337.078	224.777	161.993	90.7201	131.329	1	113.915	114.84	1
	CD71, TFRC	0	3232.87	3224.52	3793.2	10672.2	21738.6	36761.1	5848.67	37991.1	9645.01	8475.96	12512.7	2032.89	3195.16	897.184	1260.98	2187.28	10122.4	24912	17521.2	10870.3	13927.9	6384.69	15782.6	27446.3	21253.9	26024.7	27299.1	18273.5	5422.32	29452.9	19988.8	12942.9	8859.93	32131.9	13105.2	24960.3	12831	17228.8	12001.6	11232.8	35403.2	5191.98	14281.1	4743.44	12295.8	9288.45	8471.09
	CD110, MPL	0	1	1	1	53.237	85.1146	175.775	1	281.159	31.2681	1	79.3058	1	1	1	1	1	742.113	560.304	1885.87	758.002	1	4433.48	1237.43	369.774	11119.9	87.2947	5893.77	2562.7	569.66	378.117	404.336	208.298	1	547.117	238.191	1	263.336	3649.6	847.741	415.128	747.256	254.016	330.13	128.918	1	1	1
	CD135, FLT3	0	383.116	258.164	1	358.462	244.478	555.147	156.074	345.811	113.046	1	284.913	1	1	134.25	170.659	135.536	17792.9	3910.38	1070	533.171	9928.07	14149.2	1243.9	5157.97	14731.1	422.834	21518.8	696.264	2995.99	4818.98	3556.94	3973.44	337.645	22386.7	25024.3	8832.92	23562	2521.96	5494.17	2008.81	1097.37	8096.42	13160.6	6368.82	27360.5	22434.8	6447.67
	Ki67, MKI67	32	?	?	?	?	?	?	?	17510.1	6722.65	5188.73	9551.94	?	?	?	?	350.525	?	12428.6	5711.11	8697.75	999.949	?	5339.92	?	9832.86	?	7782.7	1354.34	485.266	5631.53	6612.26	9588.02	?	2143.41	782.119	1883.3	12317.5	10887.8	4287.15	5287.31	9991.29	?	?	?	?	?	?
	HLA-DR A	0	12548.4	18031	43535.4	19761.6	27336.3	21545.8	13442.9	14345.1	17931.1	12302.1	11226.2	83517.9	84565.2	62668.6	76588	55523.2	145249	116610	47895.8	109163	1464.21	75108.4	19913.1	29287.6	69544	38477.9	79408.2	81157.4	30561.2	10193.1	15574.5	53387.4	5525.69	7492.29	53129.6	19045.2	207824	24306.6	32585.5	20829.3	28792.9	44173.7	38951.7	1549.55	88939.3	310875	51224
	HLA-DR B1/B3	0	2965.21	4171.12	9200.15	5071.71	6014.16	4184.46	2599.87	5555.53	9029.27	5258.02	6030.18	20667.7	20814.2	14263.3	18601.8	28313.1	37280.8	50082.6	19233.2	30646.4	499.975	15026.4	8323.55	9474.51	26909.8	8437.58	23076.9	33822.7	19632.2	2220.43	9637.18	26245.5	590.879	2941.56	38037.1	7838.22	78263.3	16772.4	16629.8	6520.55	10184.6	4517.86	4571.21	262.892	16303.8	51510.8	11562.4
	HLA-DR B4	0	1763.38	1867.89	6603.86	5018.47	2710.99	190.95	143.753	33.0776	2975.28	1	61.6823	6268.08	7972.68	11457.1	1	1224.5	121.707	9736.76	7904.61	6711.53	1	142.251	49.5834	1	82.5678	3650.01	111.566	6526.91	3301.92	136.766	2042.96	4301.67	759.701	1	135.093	1	1	1900.51	179.64	62.7755	1	1338.47	2206.09	7.58343	5879.75	46742	4608.92
	HLA-DR B5	0	1569.2	1837.52	1	2133.03	1	1	1	1	1	1	3971.16	3811.67	4564.51	1	976.549	1	18624.1	1	1	38.5425	1	9085.09	3138.85	1	1	4733.01	1	1	1	1	1	1	1	1	15672	1	1	6517.31	1	1	1	1	1	45.5006	1	1	1
	CD1a	0	1	1	1	1	1	20.2331	1	1	1	1	1	1	1	22.9207	1	18.6947	1	1	1	23.1255	1	1	1	1	1	1	1	1	1	64.3604	1	1	1	1	1	1	1	1	26.2396	1	1	1	1	1	1	1	48.1768
	CD9	0	1228.07	1316.13	780.077	1203.16	1052.16	2214.26	558.581	3004.05	666.252	531.191	1906.28	1	639.032	1404.71	1147.21	2425.63	2825.97	1465.41	1203.75	778.558	178.562	303.468	980.889	1505.51	133.566	575.6	246.215	2940.03	1656.23	1456.15	3240.77	1420.21	94.151	1673.53	7809.34	11565	2106.69	4711.72	4505.14	5260.99	355.339	8797.06	7639.97	12524	460.916	2059.34	168.619
	CD16a, FCGR3A	0	12553.6	17869	5365.26	3765.63	2138.73	2754.24	3125.59	3855.04	637.389	2748.34	9707.61	19566.6	23644.2	62445.9	38379.3	77428.6	2541	78.3642	1257.25	1417.08	107.137	265.535	252.229	701.815	269.56	330.083	288.533	3611.59	6297.91	48.2703	1623.42	1489.65	922.03	946.191	1121.04	205.571	671.506	3364.87	940.589	1322.33	26.1278	315.427	331.334	1012.39	562.563	194.645	517.901
	CD27	0	1	1	1	1	1	48.0537	1	168.395	161.151	1	226.168	1	1	383	398	2981.8	163	94.0371	682.124	621.819	35.7125	5	112.102	1	264.703	1	211.591	2.24601	1234.26	1	419.537	407.128	1	6.43667	10.6653	179.046	125.084	375.13	450.11	405.003	1	1	1	1	1	1	1
	CD30, TNFRSF8	0	10.4963	1	250.101	1	1	173.246	36.9649	40.5952	16.8367	1	132.176	1	1	1385.07	967.068	537.472	187.013	1	1	50.1052	1	42.6752	1	60.3712	1	229.149	19.2355	235.831	1	1	12.1605	1	9.73976	141.607	55.6964	1	1	203.383	1	26.3252	15.6767	1	1.20485	1	50.8234	44.7683	28.1032
	CD36	0	5531.56	5036.73	2244.95	6824.98	13676.3	23546.3	5425.63	20475	2883.88	2571.27	10101.2	5929.26	6359.89	9060.24	10533.5	9838.07	8071.22	1347.87	3999.12	9553.4	357.125	3603.69	467.809	22141.1	5413.05	19946.8	4403.02	2284.19	6456.15	4939.66	14981.7	5216.92	4191.34	1969.62	91025.6	709.551	4641.29	14476.4	3120.49	2976.77	5241.25	10624	13034.1	556.118	12478	2754.23	20965
	CD38	0	892.188	997.221	351.332	1983.96	1070.27	2099.19	722.87	1686.96	938.044	669.762	2170.63	1	1	363.458	341.318	789.85	2336.17	1802.38	855.998	4690.62	4535.48	7814.31	3302.69	1203.65	9196.6	1535.84	13268.7	875.944	2152.05	2566.37	3459.66	2676.31	1223.96	5207.27	2348.73	470.824	11382.7	2763.76	6337.87	1028.71	3130.12	893.244	1014.49	1420.63	3604.96	3844.24	1935.1
	CD56, NCAM1	0	1	1	1	1	1	6.32285	1	27.0635	1	1	38.1843	1	1	229.207	293.913	294.441	1	1	53.4999	1	1	18.9668	79.7646	45.2784	1	1	28.8533	1	601.308	1	1	1	1	514.934	1.18503	1	1	795.455	1	228.827	15.6767	1	33.7359	1	1	5267.09	638.343
	CD57	0	1	1	1	1	1	1	1	34.5811	1	1	8.81175	1	1	1	1	126.189	1	1	1	62.9527	1	1	4.3116	1	1	1	19.2355	1	10.5493	1	1	1	1	1	39.106	1	1	49.716	1	95.1757	1	1	1	1	1	1	1
	CD68	32	?	?	?	?	?	?	?	3626.51	3639.13	4372.7	3369.03	?	?	?	?	8389.23	?	15022.4	1484.62	1609.79	1678.49	?	7696.21	?	1338.08	?	3235.42	6605.52	7268.44	3580.05	3274.21	6075.36	?	3610.97	6708.45	4038.47	5233.8	4205.52	19534.4	4169.51	4817.98	?	?	?	?	?	?
	CD90	0	1	1	1	1	1	1	1	1	1	1	1	1	1	1	1	1	1	1	1	215.838	1	1	1	1	41.2839	1	148.114	38.1822	1	1	72.9629	1	1	1	1	1	1	320.894	18.1659	22.2752	1	1	1	1	1	1	1
	CD96, TACTILE	0	829.21	369.529	1048.04	1178.31	400.22	1088.8	973.41	857.01	748.03	338.73	1145.53	3981.08	3377.74	2612.97	4522.47	3701.54	6171.41	180.238	3450.74	3477.82	214.275	315.323	823.516	1452.68	20059.1	1863.2	246.215	98.8245	11161.1	973.451	7220.29	312.447	35.7124	148.043	5408.47	775.865	3403.61	397.728	5120.76	6500.3	653.196	8269.49	10061.7	5283.13	3477.02	173.234	48.1768
	CD99, MIC2	0	4838.81	4059.75	13475.7	5394.68	15206.5	11916.1	4953.3	6910.21	5755.74	5127.15	3668.63	23801.7	22974.7	20586.1	23437.2	13334	47836.6	100314	40980.9	26460.7	215489	48512.3	25873.9	19673.5	67059.7	22082.8	49127.6	20816	31046.5	14223.6	9734.46	18383.9	16930.9	240378	235587	276937	68816.2	20869.4	52299.5	88047.6	7200.84	131488	124235	132548	52851.1	38136.8	21386.5
	CD143	0	1	1	1	1	1	1	1	1	1	1	1	1	1	1	1	1	1	15.6728	1	147.746	1	24	90.5436	1	1	1	1	1	1	1	1	1	1	1	46.2161	1	1	119.77	119.087	87.0756	1	1	1	1	9	66	1
	CD150, SLAMF1	0	1	1	1	21.2948	43.4628	45.5245	57.501	139.828	254.955	15.3968	111.616	1	1	137.524	237.027	635.619	166.233	1982.62	1912.62	377.716	71.425	54.5295	66.8298	1	313.272	24.5516	313.539	1291.46	474.717	32.1802	155.046	290.355	1	128.733	315.218	424.405	2567.52	117.51	121.106	1178.56	428.497	1	4.81941	1	108.657	103.162	1
	CD231, TSPAN7	0	110.211	232.854	1	156.162	258.966	373.048	119.109	396.931	293.439	161.667	370.094	1	1	153.896	18.9621	112.168	581.817	1512.43	26.75	862.067	35.7125	184.926	144.439	384.867	471.122	510.129	271.221	92.0865	1	1858.41	252.33	536.525	688.276	244.594	72.2868	1	2699.19	334.453	1009.22	20.2501	297.857	178.649	151.811	243.934	148.965	114.84	750.756
	CD243, ABCB1, MDR1	0	15.7445	1	893.218	106.474	447.304	145.426	16.4289	109.757	139.504	15.3968	32.3098	1	273.871	537	1014.47	537.472	1193.32	2460.64	19540.8	407.266	71.425	2716.99	689.856	335.815	10182.6	204.597	1419.58	1273.49	3312.47	64.3604	139.846	356.631	1	1	2285.92	1604.78	618.839	973.981	589.382	9434.54	679.324	185.627	815.685	1	108.657	11.6787	1
	CD244, NKR2B4	0	540.561	329.032	136.96	376.208	253.533	663.9	373.757	610.432	281.413	153.968	578.638	1	821.612	2357.56	2607.29	2262.05	3799.62	767.97	3437.37	1067.63	5321.16	3331.04	441.939	1339.49	3404.71	300.076	2142.84	1152.2	2542.37	740.144	1441.02	470.248	288.946	1853.76	3834.75	2446.96	1672.18	1905.03	1709.61	2371.29	1781.92	608.522	524.111	2522.76	1607.07	836.973	1232.52
	CD304, NRP1	0	1	1	1	24.8439	677.295	249.12	1	78.1834	146.72	1	290.788	1	1	29.4695	1	56.084	2.96845	1	1	1215.37	1	163.588	135.815	15.0928	131.137	1	327.004	168.451	1	24.1351	231.049	754.291	1	64.3667	1	311.672	5497.13	456.483	2157.7	656.105	52.2557	609.918	1350.64	79.6261	150.718	29.1967	172.634
	CLL-1 (CLEC12A)	0	5699.51	5461.94	1196.91	4574.83	1474.11	5508.47	3396.67	10251	4141.82	3225.64	14139.9	1016.44	1491.07	8189.26	6276.46	6594.54	7254.9	1872.91	2474.37	3948.04	4821.18	3281.25	5124.34	8965.13	1826.21	900.227	16604.1	2490.83	2046.56	7441.67	17529.3	6905.39	7126.26	21241	9443.5	2221.49	14950.9	10363.5	8624.75	433.353	6249.78	505.241	727.731	1900.91	1316.15	6362.94	5909.69
	Lysozyme, LYZ	0	424267	535715	285341	628750	567022	701567	523091	659836	690391	682696	903481	232935	236929	346293	340418	371687	383325	1.3405e+06	135328	152505	65925.2	417710	299486	641946	164043	629850	292802	257184	133300	4.77786e+06	305413	1.32053e+06	1.37185e+06	465861	49050.7	105385	402462	617016	1.5242e+06	91247.2	663151	34565.7	28152.6	768670	482800	191706	1.861e+06
[truncated: 74 more columns]
