# Supplementary material for: Using Digital RNA Counting and Flow Cytometry to Compare mRNA with Protein Expression in Acute Leukemias
Source: PLoS One. 2012 Nov 9;7(11):e49010. doi: 10.1371/journal.pone.0049010 (PMC3494663; doi:10.1371/journal.pone.0049010)
Supplement: Table S10 — Target sequences for probes used in the nCounter analysis. (XLSX) [file pone.0049010.s013.xlsx]

## Sheet: Sheet1
Table S10: target sequences for nCounter probes
	Gene		Target Sequence
1	ALAS2		CCGCTGGGCTGATGCATATCCCTTTGCCCAACATTTCTCTGAGGCATCTGTGGCCTCAAAGGATGTGTCCGTCTGGTGTAGTAATGATTACCTGGGCATG
2	CA1		CCAACCTCTGAAGGGCAGAACAGTGAGAGCTTCATTTTGATGATTCTGAGAAGAAACTTGTCCTTCCTCAAGAACACAGCCCTGCTTCTGACATAATCCA
3	CD10		GGATTGTAGGTGCAAGCTGTCCAGAGAAAAGAGTCCTTGTTCCAGCCCTATTCTGCCACTCCTGACAGGGTGACCTTGGGTATTTGCAATATTCCTTTGG
4	CD110		CAGTGGCACTTGGACTGCAATGCTTTACCTTGGACCTGAAGAATGTTACCTGTCAATGGCAGCAACAGGACCATGCTAGCTCCCAAGGCTTCTTCTACCA
5	CD114		CAACATGGGGAAACTGAGGCTCGGCTCGGAAAGGTGAAGTAACTTGTCCAAGATCACAAAGCTGGTGAACATCAAGTTGGTGCTATGGCAAGGCTGGGAA
6	CD116		GAAACTGCTTTATCCAAATTCAGGAAGGGAGGGTACCGCTGCTCAGAATTTCTCCTGTTTCATCTACAATGCGGATTTAATGAACTGTACCTGGGCGAGG
7	CD117		CATCGCAGCTACCGCGATGAGAGGCGCTCGCGGCGCCTGGGATTTTCTCTGCGTTCTGCTCCTACTGCTTCGCGTCCAGACAGGCTCTTCTCAACCATCT
8	CD11b		GCCCTCCGAGGGTGTCCTCAAGAGGATAGTGACATTGCCTTCTTGATTGATGGCTCTGGTAGCATCATCCCACATGACTTTCGGCGGATGAAGGAGTTTG
9	CD11c		CCCCTCAGCCTGTTGGCTTCTGTTCACCAGCTGCAAGGGTTTACATACACGGCCACCGCCATCCAAAATGTCGTGCACCGATTGTTCCATGCCTCATATG
10	CD123		GACGTCCAGTACGACCTGTACTTGAACGTTGCCAACAGGCGTCAACAGTACGAGTGTCTTCACTACAAAACGGATGCTCAGGGAACACGTATCGGGTGTC
11	CD13		CCGGACTTAATCCGGAAGCAGGACGCCACCTCTACCATCATCAGCATTACCAACAACGTCATTGGGCAAGGTCTGGTCTGGGACTTTGTCCAGAGCAACT
12	CD133		AGCCTGCGGTCATCTCTCAATGACCCTCTGTGCTTGGTGCATCCATCAAGTGAAACCTGCAACAGCATCAGATTGTCTCTAAGCCAGCTGAATAGCAACC
13	CD135		AAATGGAAAACCAGGACGCCCTGGTCTGCATATCTGAGAGCGTTCCAGAGCCGATCGTGGAATGGGTGCTTTGCGATTCACAGGGGGAAAGCTGTAAAGA
14	CD14		GCCCAAGCACACTCGCCTGCCTTTTCCTGCGAACAGGTTCGCGCCTTCCCGGCCCTTACCAGCCTAGACCTGTCTGACAATCCTGGACTGGGCGAACGCG
15	CD143		GAAGTACGGCACCCAGGCCAGGAAGTTTGATGTGAACCAGTTGCAGAACACCACTATCAAGCGGATCATAAAGAAGGTTCAGGACCTAGAACGGGCAGCA
16	CD15		GGGGCAGCCGGTGCCCGAAATTGGGCTCCTGCACACAGTGGCCCGCTACAAGTTCTACCTGGCTTTCGAGAACTCGCAGCACCTGGATTATATCACCGAG
17	CD150		GTGTCTCTTGATCCATCCGAAGCAGGCCCTCCACGTTATCTAGGAGATCGCTACAAGTTTTATCTGGAGAATCTCACCCTGGGGATACGGGAAAGCAGGA
18	CD163		CATCTGTGATTCGGACTTCTCTCTGGAAGCTGCCAGCGTTCTATGCAGGGAATTACAGTGTGGCACAGTTGTCTCTATCCTGGGGGGAGCTCACTTTGGA
19	CD16a		AAATCATGAGGGTGACGTAGAATTGAGTCTTCCAGGGGACTCTATCAGAACTGGACCATCTCCAAGTATATAACGATGAGTCCTCTTAATGCTAGGAGTA
20	CD19		AGATTCACACCTGACTCTGAAATCTGAAGACCTCGAGCAGATGATGCCAACCTCTGGAGCAATGTTGCTTAGGATGTGTGCATGTGTGTAAGTGTGTGTG
21	CD1a		CCTGTTTTAGATATCCCTTACTCCAGAGGGCCTTCCCTGACTTACAAGTGGGAAGCAGTCTCTTCCTGGTCTGAACTCCCGCCACATTTTAGCCGTACTT
22	CD2		TGGGTCTCACTACAAGCAGCCTATCTGCTTAAGAGACTCTGGAGTTTCTTATGTGCCCTGGTGGACACTTGCCCACCATCCTGTGAGTAAAAGTGAAATA
23	CD20		CTTCTGATGATCCCAGCAGGGATCTATGCACCCATCTGTGTGACTGTGTGGTACCCTCTCTGGGGAGGCATTATGTATATTATTTCCGGATCACTCCTGG
24	CD200		CCCTCGGTCAGGGATTGAAAATAGTACAGTGACTCTGTCTCACCCAAATGGGACCACGTCTGTTACCAGCATCCTCCATATCAAAGACCCTAAGAATCAG
25	CD203c		CTTTTTATGAGCCATCCCATGCAGAGGAGGTGTCAAAGTTTTCTGTTTGTGGCTTTGCTAATCCATTGCCCACAGAGTCTCTTGACTGTTTCTGCCCTCA
26	CD21		GGTGTCAAGCAAATAATATGTGGGGGCCGACACGACTACCAACCTGTGTAAGTGTTTTCCCTCTCGAGTGTCCAGCACTTCCTATGATCCACAATGGACA
27	CD22		TTTTCCAGAAGATGAGGGGATTCATTACTCAGAGCTGATCCAGTTTGGGGTCGGGGAGCGGCCTCAGGCACAAGAAAATGTGGACTATGTGATCCTCAAA
28	CD23		AACTTGGAAAGCCACCACGGTGACCAGATGGCGCAGAAATCCCAGTCCACGCAGATTTCACAGGAACTGGAGGAACTTCGAGCTGAACAGCAGAGATTGA
29	CD231		GGCGTTTGGAATCGCATTCTCCCAGTTAATTGGCATGCTGCTGGCCTGCTGTCTGTCCCGGTTCATCACGGCCAATCAGTATGAGATGGTGTAAGGAGAA
30	CD243		TATAGCACTAAAGTAGGAGACAAAGGAACTCAGCTCTCTGGTGGCCAGAAACAACGCATTGCCATAGCTCGTGCCCTTGTTAGACAGCCTCATATTTTGC
31	CD244		AAGAGGAACCACAGCCCTTCCTTCAATAGCACTATCTATGAAGTGATTGGAAAGAGTCAACCTAAAGCCCAGAACCCTGCTCGATTGAGCCGCAAAGAGC
32	CD25		CTTGGTAAGAAGCCGGGAACAGACAACAGAAGTCATGAAGCCCAAGTGAAATCAAAGGTGCTAAATGGTCGCCCAGGAGACATCCGTTGTGCTTGCCTGC
33	CD26		CAGCAGTCAGCTCAGATCTCCAAAGCCCTGGTCGATGTTGGAGTGGATTTCCAGGCAATGTGGTATACTGATGAAGACCATGGAATAGCTAGCAGCACAG
34	CD27		TGCGCTGCAGGAGGGCGGGGGCTCTGGTTGTAAAACACACTTCCTGCTGCGAAAGACCCACATGCTACAAGACGGGCAAAATAAAGTGACAGATGACCAC
35	CD28		GCTTGTAGCGTACGACAATGCGGTCAACCTTAGCTGCAAGTATTCCTACAATCTCTTCTCAAGGGAGTTCCGGGCATCCCTTCACAAAGGACTGGATAGT
36	CD3		TATCTACTGGATGAGTTCCGCTGGGAGATGGAACATAGCACGTTTCTCTCTGGCCTGGTACTGGCTACCCTTCTCTCGCAAGTGAGCCCCTTCAAGATAC
37	CD30		GAAACCGCTCAGATGTTTTGGGGAAAGTTGGAGAAGCCGTGGCCTTGCGAGAGGTGGTTACACCAGAACCTGGACATTGGCCAGAAGAAGCTTAAGTGGG
38	CD300E		ATGATGCTGGATCTTACTGGTGCAAAATTCAGACAGTGTGGGTCCTGGATTCATGGTCACGCGATCCCTCGGACCTGGTTAGGGTGTATGTTTCCCCAGC
39	CD303		TACGAGAGTATCAACAGTATCATCCAAGCCTGACCTGCGTCATGGAAGGAAAGGACATAGAAGATTGGAGCTGCTGCCCAACCCCTTGGACTTCATTTCA
40	CD304		GCCTCGCTGCTTTCTTTTCTCCAAGACGGGCTGAGGATTGTACAGCTCTAGGCGGAGTTGGGGCTCTTCGGATCGCTTAGATTCTCCTCTTTGCTGCATT
41	CD33		GGAATGACACCCACCCTACCACAGGGTCAGCCTCCCCGAAACACCAGAAGAAGTCCAAGTTACATGGCCCCACTGAAACCTCAAGCTGTTCAGGTGCCGC
42	CD34		AGGTAAACTCCTGTCCTTTACACATTCGGCTCCCTGGAGCCAGACTCTGGTCTTCTTTGGGTAAACGTGTGACGGGGGAAAGCCAAGGTCTGGAGAAGCT
43	CD36		AGCCAAGGAAAATGTAACCCAGGACGCTGAGGACAACACAGTCTCTTTCCTGCAGCCCAATGGTGCCATCTTCGAACCTTCACTATCAGTTGGAACAGAG
44	CD38		CCTTGACTCCTTGTGGTTTATGTCATCATACATGACTCAGCATACCTGCTGGTGCAGAGCTGAAGATTTTGGAGGGTCCTCCACAATAAGGTCAATGCCA
45	CD4		AGACATCGTGGTGCTAGCTTTCCAGAAGGCCTCCAGCATAGTCTATAAGAAAGAGGGGGAACAGGTGGAGTTCTCCTTCCCACTCGCCTTTACAGTTGAA
46	CD41		AGTTACCGCCCAGGCATCCTTTTGTGGCACGTGTCCTCCCAGAGCCTCTCCTTTGACTCCAGCAACCCAGAGTACTTCGACGGCTACTGGGGGTACTCGG
47	CD42b		CTGGGGTCTATTCTACTCATGGTCCACTGCTTCTCTAGACAGCCAAATGCCCTCCTCCTTGCATCCAACACAAGAATCCACTAAGGAGCAGACCACATTC
48	CD44		AGGACAAGGTTCAAAATGGTTACAACAGCCTCTACCTGTCGCCCCAGGGAGAAAGGGGTAGTGATACAAGTCTCATAGCCAGAGATGGTTTTCCACTCCT
49	CD45		AGGAGGAAATTGTTCCTCGTCTGATAAGACAACAGTGGAGAAAGGACGCATGCTGTTTCTTAGGGACACGGCTGACTTCCAGATATGACCATGTATTTGT
50	CD48		AATTTAAAGGCAGGGTCAGACTTGATCCTCAGAGTGGCGCACTGTACATCTCTAAGGTCCAGAAAGAGGACAACAGCACCTACATCATGAGGGTGTTGAA
51	CD5		CCAGAAGAAGCAGCGCCAGTGGATTGGCCCAACGGGAATGAACCAAAACATGTCTTTCCATCGCAACCACACGGCAACCGTCCGATCCCATGCTGAGAAC
52	CD56		GGTATTTGCCTATCCCAGTGCCACGATCTCATGGTTTCGGGATGGCCAGCTGCTGCCAAGCTCCAATTACAGCAATATCAAGATCTACAACACCCCCTCT
53	CD57		CTGGACAGCGACCCCTTCTCAGACTCCAGTTGGGCCGGACTCTCCAAACCTGCTTCCGCAATGGGTGGGTTGTGAGTGCTGGTAATGAGGAGCCGTGGGT
54	CD58		GTGCTTGAGTCTCTTCCATCTCCCACACTAACTTGTGCATTGACTAATGGAAGCATTGAAGTCCAATGCATGATACCAGAGCATTACAACAGCCATCGAG
55	CD61		GAATAAGCCTTGGAATTAGATATGGGGCAATGACTGAGCCCTGTCTCACCCATGGATTACTCCTTACTGTAGGGAATGGCAGTATGGTAGAGGGATAAAT
56	CD64		CCAGGAGTGGGTAGATTTCAGGGAGACAAGAGGGAATAGTATAGACAATAAGGAAGGAAATAGTACTTACAAATGACTCCTAAGGGACTGTGAGACTGAG
57	CD67		ATTTCCCCTTCAGACACCTATTACCATGCAGGGGTAAATCTCAACCTCTCCTGCCATGCGGCCTCTAATCCACCCTCACAGTATTCTTGGTCTGTCAATG
58	CD68		ACCGGTCCATCTTGCTGCCTCTCATCATCGGCCTGATCCTTCTTGGCCTCCTCGCCCTGGTGCTTATTGCTTTCTGCATCATCCGGAGACGCCCATCCGC
59	CD7		CCTACACCTGCCAGGCCATCACGGAGGTCAATGTCTACGGCTCCGGCACCCTGGTCCTGGTGACAGAGGAACAGTCCCAAGGATGGCACAGATGCTCGGA
60	CD71		CAGTTTCCACCATCTCGGTCATCAGGATTGCCTAATATACCTGTCCAGACAATCTCCAGAGCTGCTGCAGAAAAGCTGTTTGGGAATATGGAAGGAGACT
61	CD79a		TCATTGATGGTGAGCCTGGGGGAAGACGCCCACTTCCAATGCCCGCACAATAGCAGCAACAACGCCAACGTCACCTGGTGGCGCGTCCTCCATGGCAACT
62	CD79b		CTGCAGCCGGTGCAGTTACACGTTTTCCTCCAAGGAGCCTCGGACGTTGTCACGGGTTTGGGGTCGGGGACAGAGCGGTG
63	CD85g		AGACTGGGGCAGCAGTTGGGGAAGTGTCTGCTGAGAATATCAAGGGGAAGAAGCATGGGTCAGGTGCAGGAAGATGTCTGGGTGTCTGTAGAAGATGCTT
64	CD8A		GAAAATCTCTGTGAAACCCCTATGTGGAGGCGGAATTGCTCTCCCAGCCCTTGCATTGCAGAGGGGCCCATGAAAGAGGACAGGCTACCCCTTTACAAAT
65	CD8B		CAGCTGAGTGTGGTTGATTTCCTTCCCACCACTGCCCAGCCCACCAAGAAGTCCACCCTCAAGAAGAGAGTGTGCCGGTTACCCAGGCCAGAGACCCAGA
66	CD9		ATATTCGCCATTGAAATAGCTGCGGCCATCTGGGGATATTCCCACAAGGATGAGGTGATTAAGGAAGTCCAGGAGTTTTACAAGGACACCTACAACAAGC
67	CD90		CCTGCCTAGTGGACCAGAGCCTTCGTCTGGACTGCCGCCATGAGAATACCAGCAGTTCACCCATCCAGTACGAGTTCAGCCTGACCCGTGAGACAAAGAA
68	CD96		CCAGCTACATCTTCAGTGACCCTTGTAGATGTGAGTGCCTTGAGGCCAAACACCACTCCTCAACCCAGCAATTCCAGTATGACTACCCGAGGCTTCAACT
69	CD99		AGAAGCTATGCTTCAAAGAAAATGCAGAACAAGGGGAGGTGGACATGGAGAGCCACCGGAATGCCAACGCAGAGCCAGCTGTTCAGCGTACTCTTTTAGA
70	CLL-1		AAAGCACCTCCAGCTCCCTCTCATGTATGGCGTCCAGCAGCCTTGTTTCTGACTCTTCTGTGCCTTCTGTTGCTCATTGGATTGGGAGTCTTGGCAAGCA
71	Elastase		ACTTCTGCGGCGCCACCCTGATTGCGCCCAACTTCGTCATGTCGGCCGCGCACTGCGTGGCGAATGTAAACGTCCGCGCGGTGCGGGTGGTCCTGGGAGC
72	Glycophorine		TGATAACAAAGCAGCAAGGCAAGCAAAAGCGTAAGATGAAGAGAGAGGAAATGAAGCCAAACACATCCTTTCATCAGAAGCCCATTCCCTCTATAAGGCG
73	HLA-DR A		GGCCAACATAGCTGTGGACAAAGCCAACCTGGAAATCATGACAAAGCGCTCCAACTATACTCCGATCACCAATGTACCTCCAGAGGTAACTGTGCTCACG
74	HLA-DR B		GGTCTGAATCTGCACAGAGCAAGATGCTGAGTGGAGTCGGGGGCTTTGTGCTGGGCCTGCTCTTCCTTGGGGCCGGGCTGTTCATCTACTTCAGGAATCA
75	IgD		ACCAAGGCTCCGGATGTGTTCCCCATCATATCAGGGTGCAGACACCCAAAGGATAACAGCCCTGTGGTCCTGGCATGCTTGATAACTGGGTACCACCCAA
76	IgM		TCGGATACGAGCAGCGTGGCCGTTGGCTGCCTCGCACAGGACTTCCTTCCCGACTCCATCACTTTCTCCTGGAAATACAAGAACAACTCTGACATCAGCA
77	Kappa		AATCTGGAACTGCCTCTGTTGTGTGCCTGCTGAATAACTTCTATCCCAGAGAGGCCAAAGTACAGTGGAAGGTGGATAACGCCCTCCAATCGGGTAACTC
78	Ki67		GTTTTGGAGGAAATGTGTTCTTCAGTGCACAGAATGCAGCAAAACAGCCATCTGATAAATGCTCTGCAAGCCCTCCCTTAAGACGGCAGTGTATTAGAGA
79	Lactotransferrin		TTCCCCAACCTGTGTCGCCTGTGTGCGGGGACAGGGGAAAACAAATGTGCCTTCTCCTCCCAGGAACCGTACTTCAGCTACTCTGGTGCCTTCAAGTGTC
80	Lamda		GTGACTTCTACCCGGGAGCCGTGACAGTGGCCTGGAAGGCAGATAGCAGCCCCGTCAAGGCGGGAGTGGAGACCACCACACCCTCCAAACAAAGCAACAA
81	Lysozyme		ATGATGGCAAAACCCCAGGAGCAGTTAATGCCTGTCATTTATCCTGCAGTGCTTTGCTGCAAGATAACATCGCTGATGCTGTAGCTTGTGCAAAGAGGGT
82	MPO		AGACCTGCTGGAGAGGAAGCTGCGGTCCCTGTGGCGAAGGCCATTCAATGTCACTGATGTGCTGACGCCCGCCCAGCTGAATGTGTTGTCCAAGTCAAGC
83	PRG2		CTCTGGAAGTGAAGATGCCTCCAAGAAAGATGGGGCTGTTGAGTCTATCTCAGTGCCAGATATGGTGGACAAAAACCTTACGTGTCCTGAGGAAGAGGAC
84	TCL1A		TATTTGGACGAGAAGCAGCACGCCTGGCTGCCCTTAACCATCGAGATAAAGGATAGGTTACAGTTACGGGTGCTCTTGCGTCGGGAAGACGTCGTCCTGG
85	TCRA		TGCTGTGGCCTGGAGCAACAAATCTGACTTTGCATGTGCAAACGCCTTCAACAACAGCATTATTCCAGAAGACACCTTCTTCCCCAGCCCAGAAAGTTCC
86	TCRB		CTTCCGCTGTCAAGTCCAGTTCTACGGGCTCTCGGAGAATGACGAGTGGACCCAGGATAGGGCCAAACCCGTCACCCAGATCGTCAGCGCCGAGGCCTGG
87	TdT		CAGAAAGTACAAGTCAGCTCACAACCAGAGCTCCTCGATGTCTCCTGGCTGATCGAATGCATAAGAGCAGGGAAACCGGTGGAAATGACAGGAAAACACC
88	Tryptase		GCAGGTGAAGGTCCCCATAATGGAAAACCACATTTGTGACGCAAAATACCACCTTGGCGCCTACACGGGAGACGACGTCCGCATCGTCCGTGACGACATG
Housekeeping genes
	ACTB		TGCAGAAGGAGATCACTGCCCTGGCACCCAGCACAATGAAGATCAAGATCATTGCTCCTCCTGAGCGCAAGTACTCCGTGTGGATCGGCGGCTCCATCCT
	ALAS1		GGGGATCGGGATGGAGTCATGCCAAAAATGGACATCATTTCTGGAACACTTGGCAAAGCCTTTGGTTGTGTTGGAGGGTACATCGCCAGCACGAGTTCTC
	B2M		CGGGCATTCCTGAAGCTGACAGCATTCGGGCCGAGATGTCTCGCTCCGTGGCCTTAGCTGTGCTCGCGCTACTCTCTCTTTCTGGCCTGGAGGCTATCCA
	G6PD		ACAACATCGCCTGCGTTATCCTCACCTTCAAGGAGCCCTTTGGCACTGAGGGTCGCGGGGGCTATTTCGATGAATTTGGGATCATCCGGGACGTGATGCA
	GAPDH		TCCTCCTGTTCGACAGTCAGCCGCATCTTCTTTTGCGTCGCCAGCCGAGCCACATCGCTCAGACACCATGGGGAAGGTGAAGGTCGGAGTCAACGGATTT
	PGK1		GCAAGAAGTATGCTGAGGCTGTCACTCGGGCTAAGCAGATTGTGTGGAATGGTCCTGTGGGGGTATTTGAATGGGAAGCTTTTGCCCGGGGAACCAAAGC
	PPIA		AGCACTGGAGAGAAAGGATTTGGTTATAAGGGTTCCTGCTTTCACAGAATTATTCCAGGGTTTATGTGTCAGGGTGGTGACTTCACACGCCATAATGGCA
	TBP		CGCCGGCTGTTTAACTTCGCTTCCGCTGGCCCATAGTGATCTTTGCAGTGACCCAGCAGCATCACTGTTTCTTGGCGTGTGAAGATAACCCAAGGAATTG
